# Supplementary material for: Double-stranded DNA virioplankton dynamics and reproductive strategies in the oligotrophic open ocean water column
Source: PubMed Central journal article supplement (PMC7174320; doi:10.1038/s41396-020-0604-8), 2020-02-14

39571. putative SAR116 temperate phage  
complete genome 55kbp

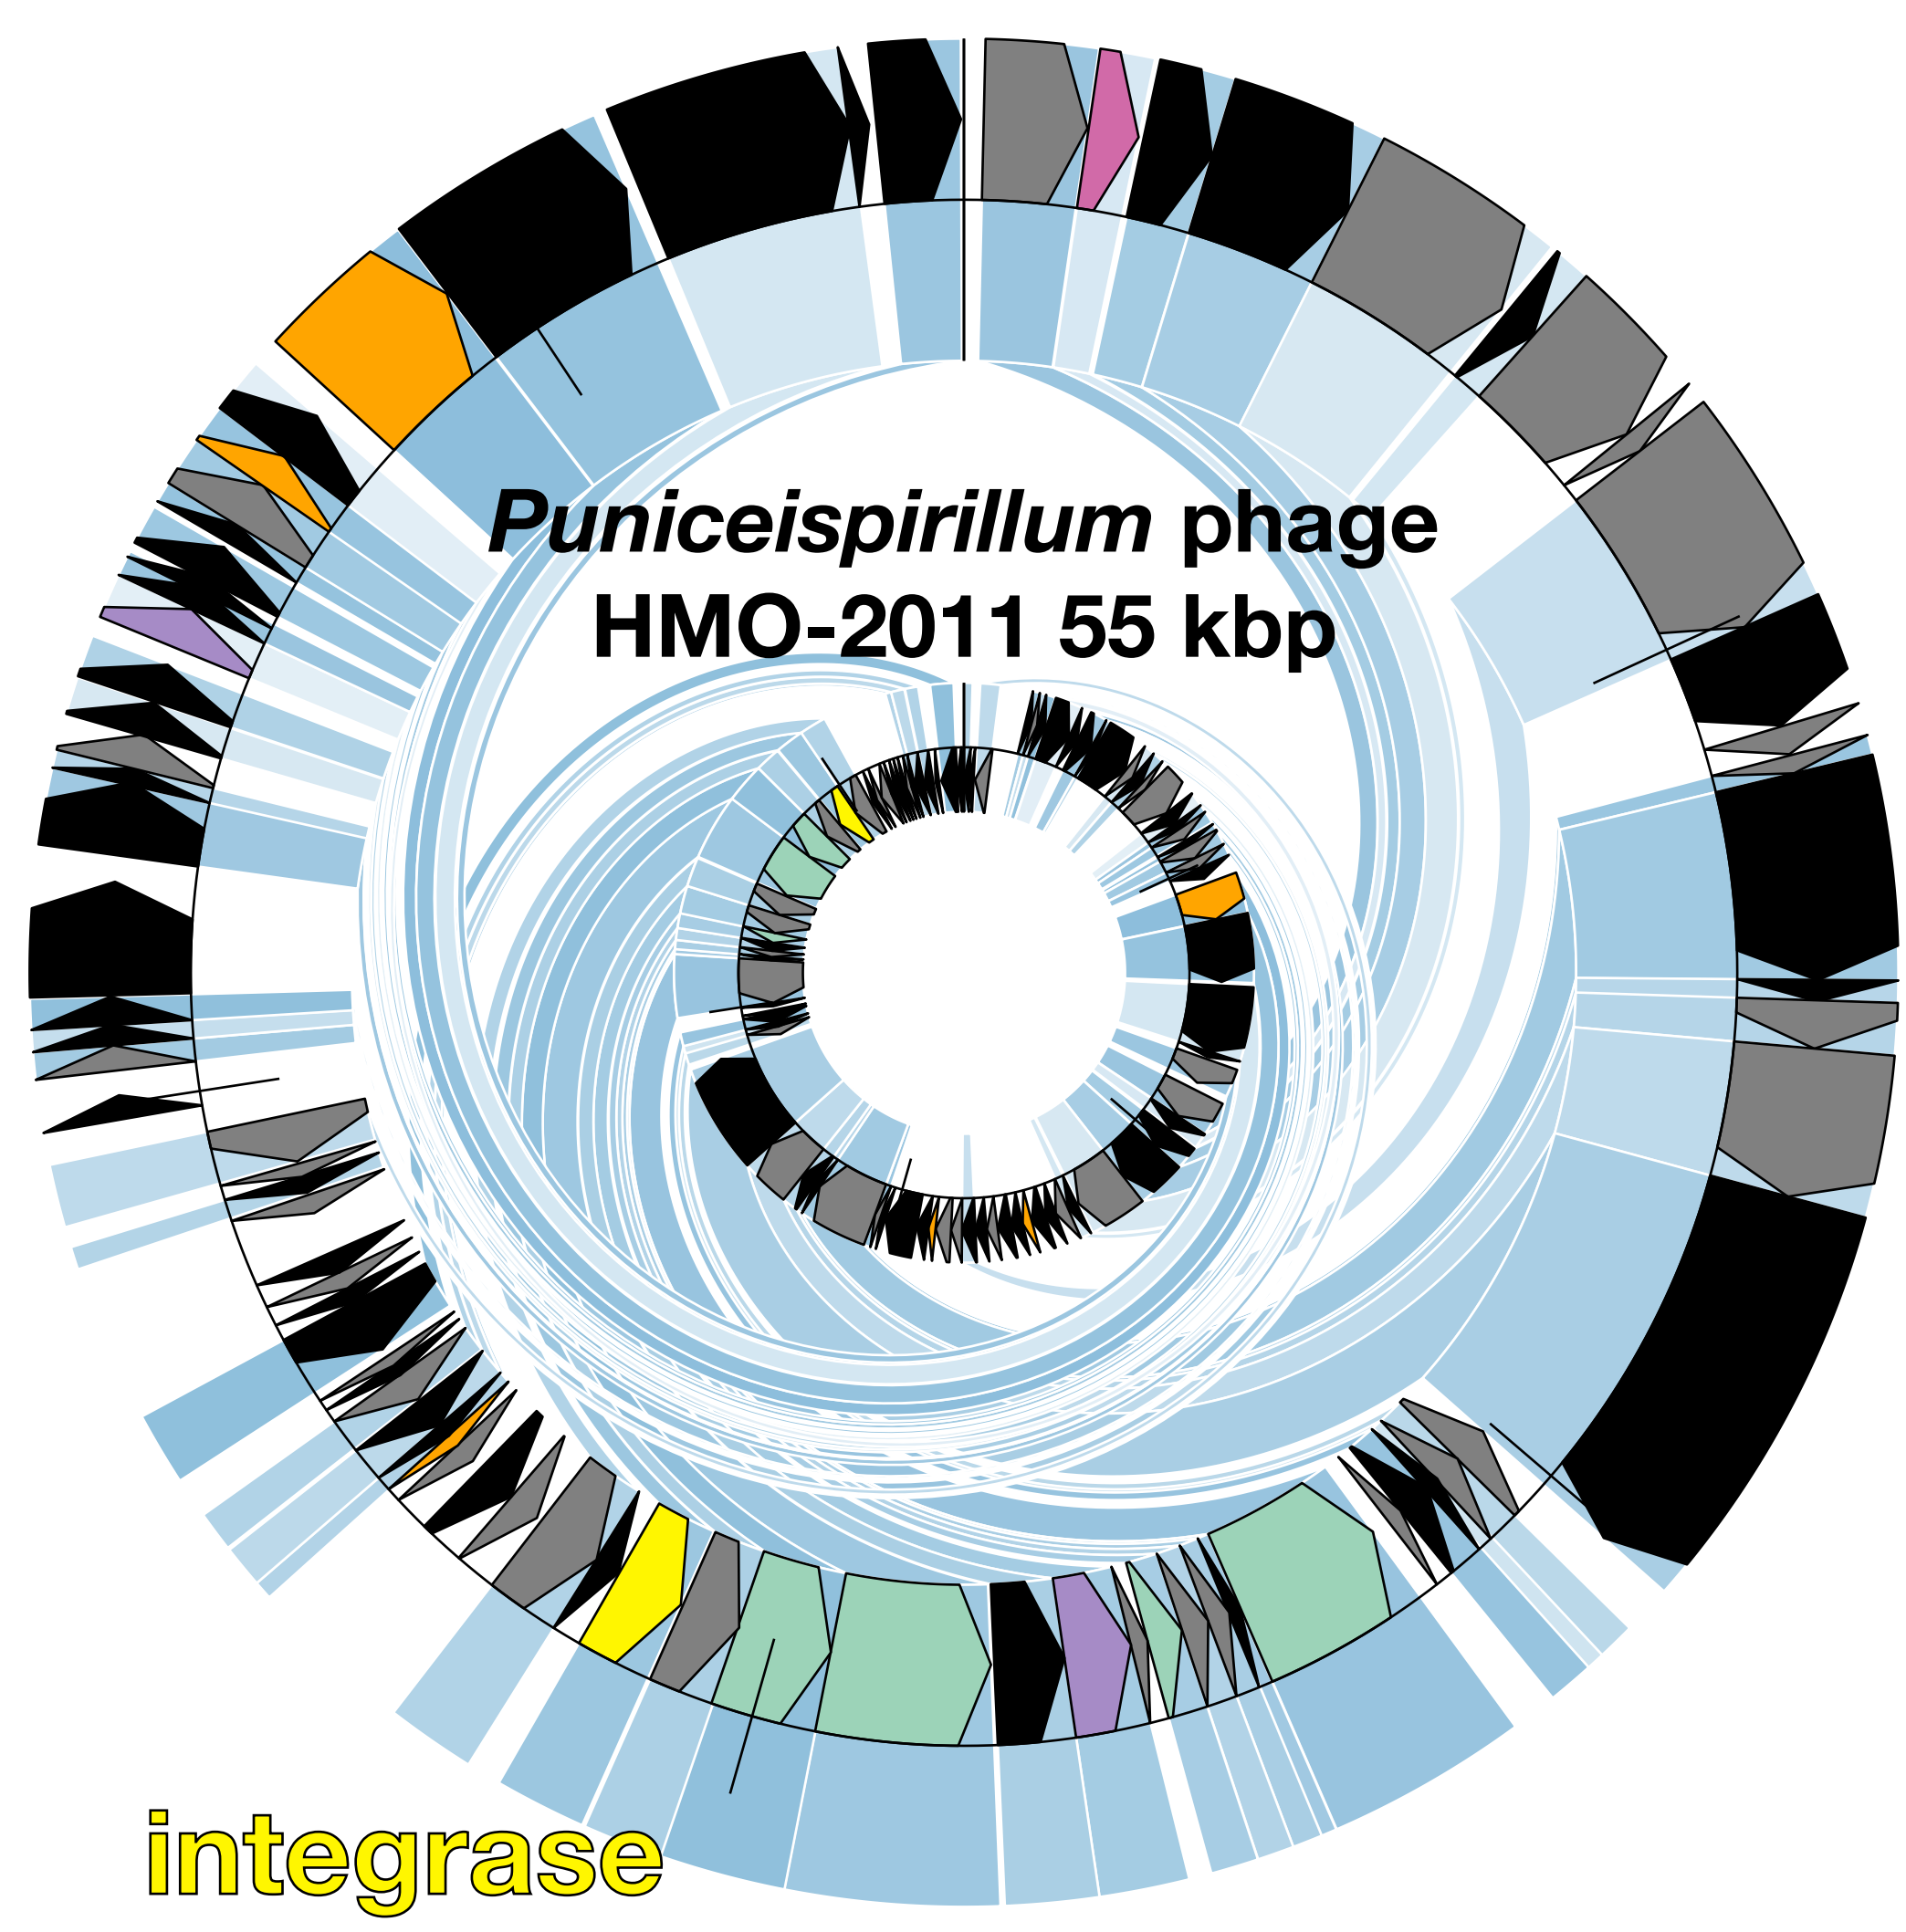

16956. putative *Marinomonas* phage  
complete genome 47kbp

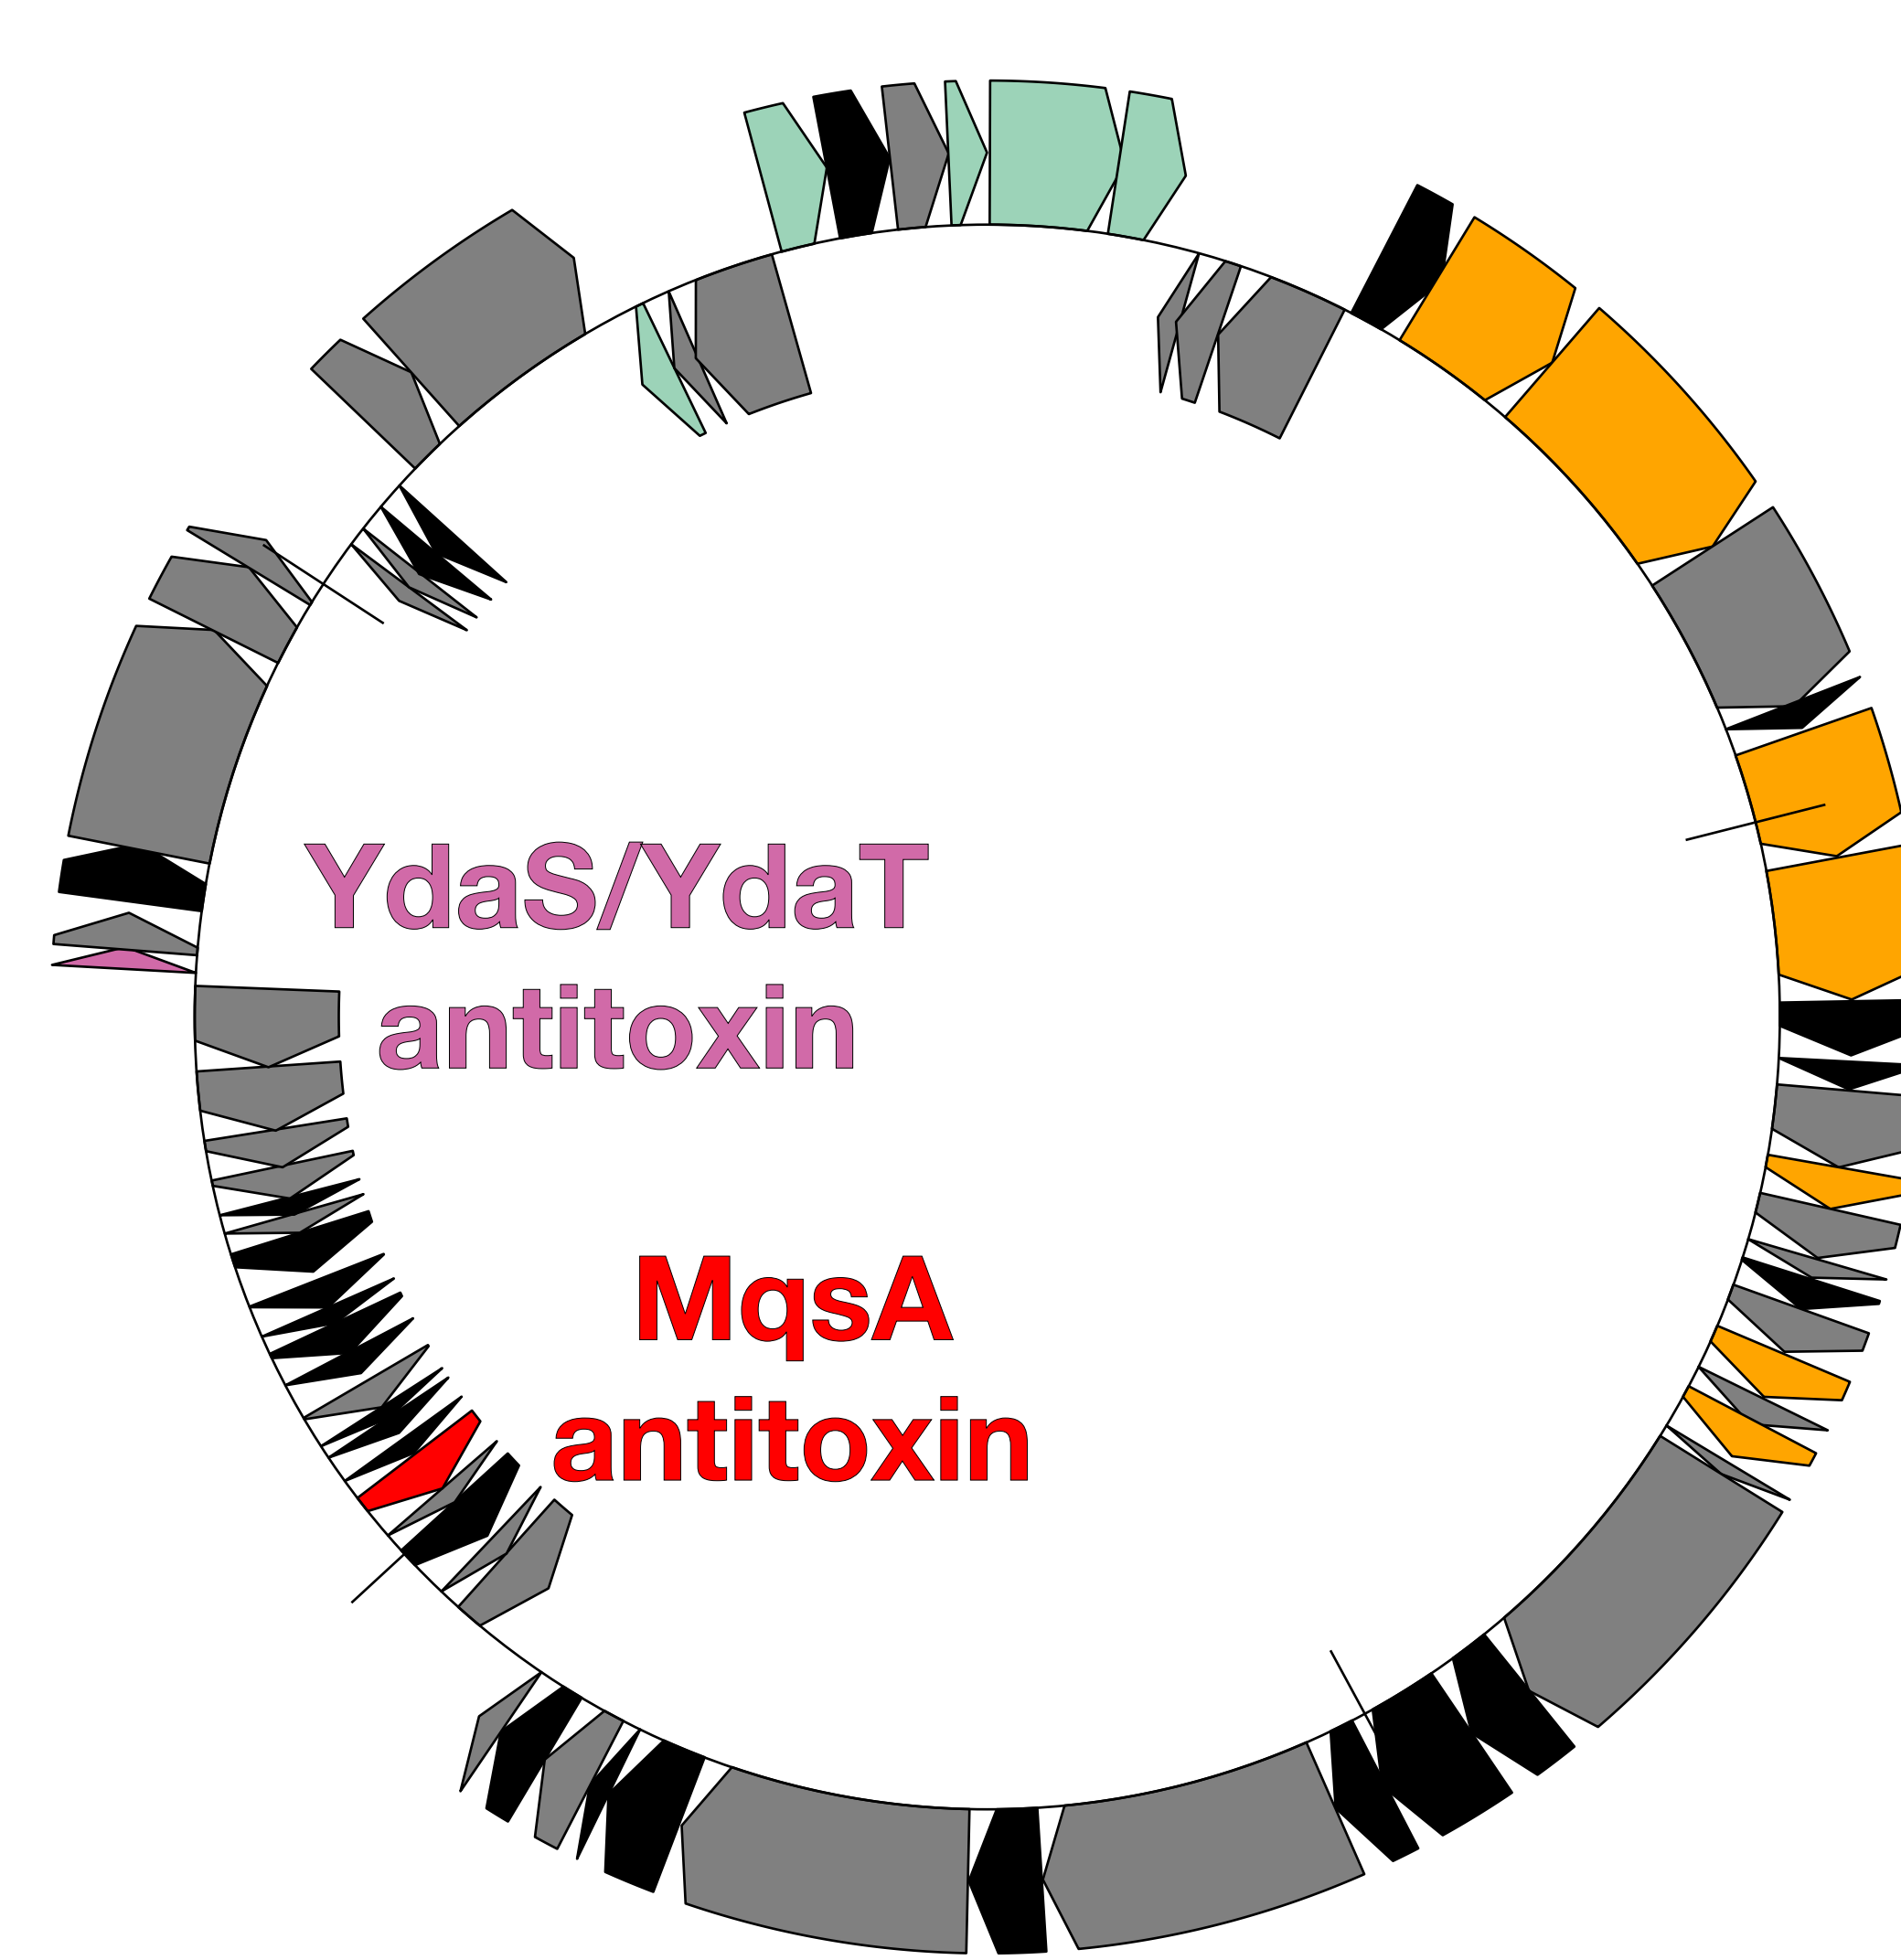

protein

structural  
regulatory  
replication  
lysogeny  
AMG  
other  
hypothetical  
novel viral genes

AAI

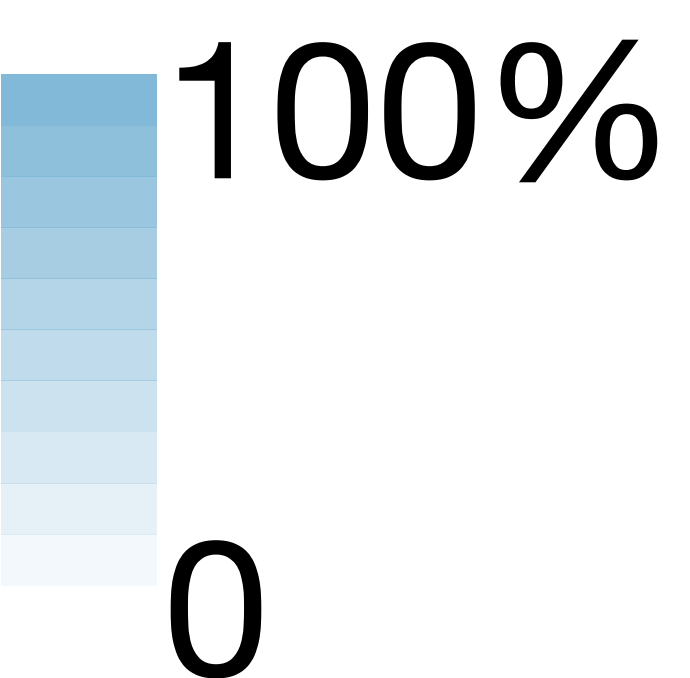

30093. putative SAR11 temperate phage  
complete genome 156kbp  
most abundant temperate phage in both fractions

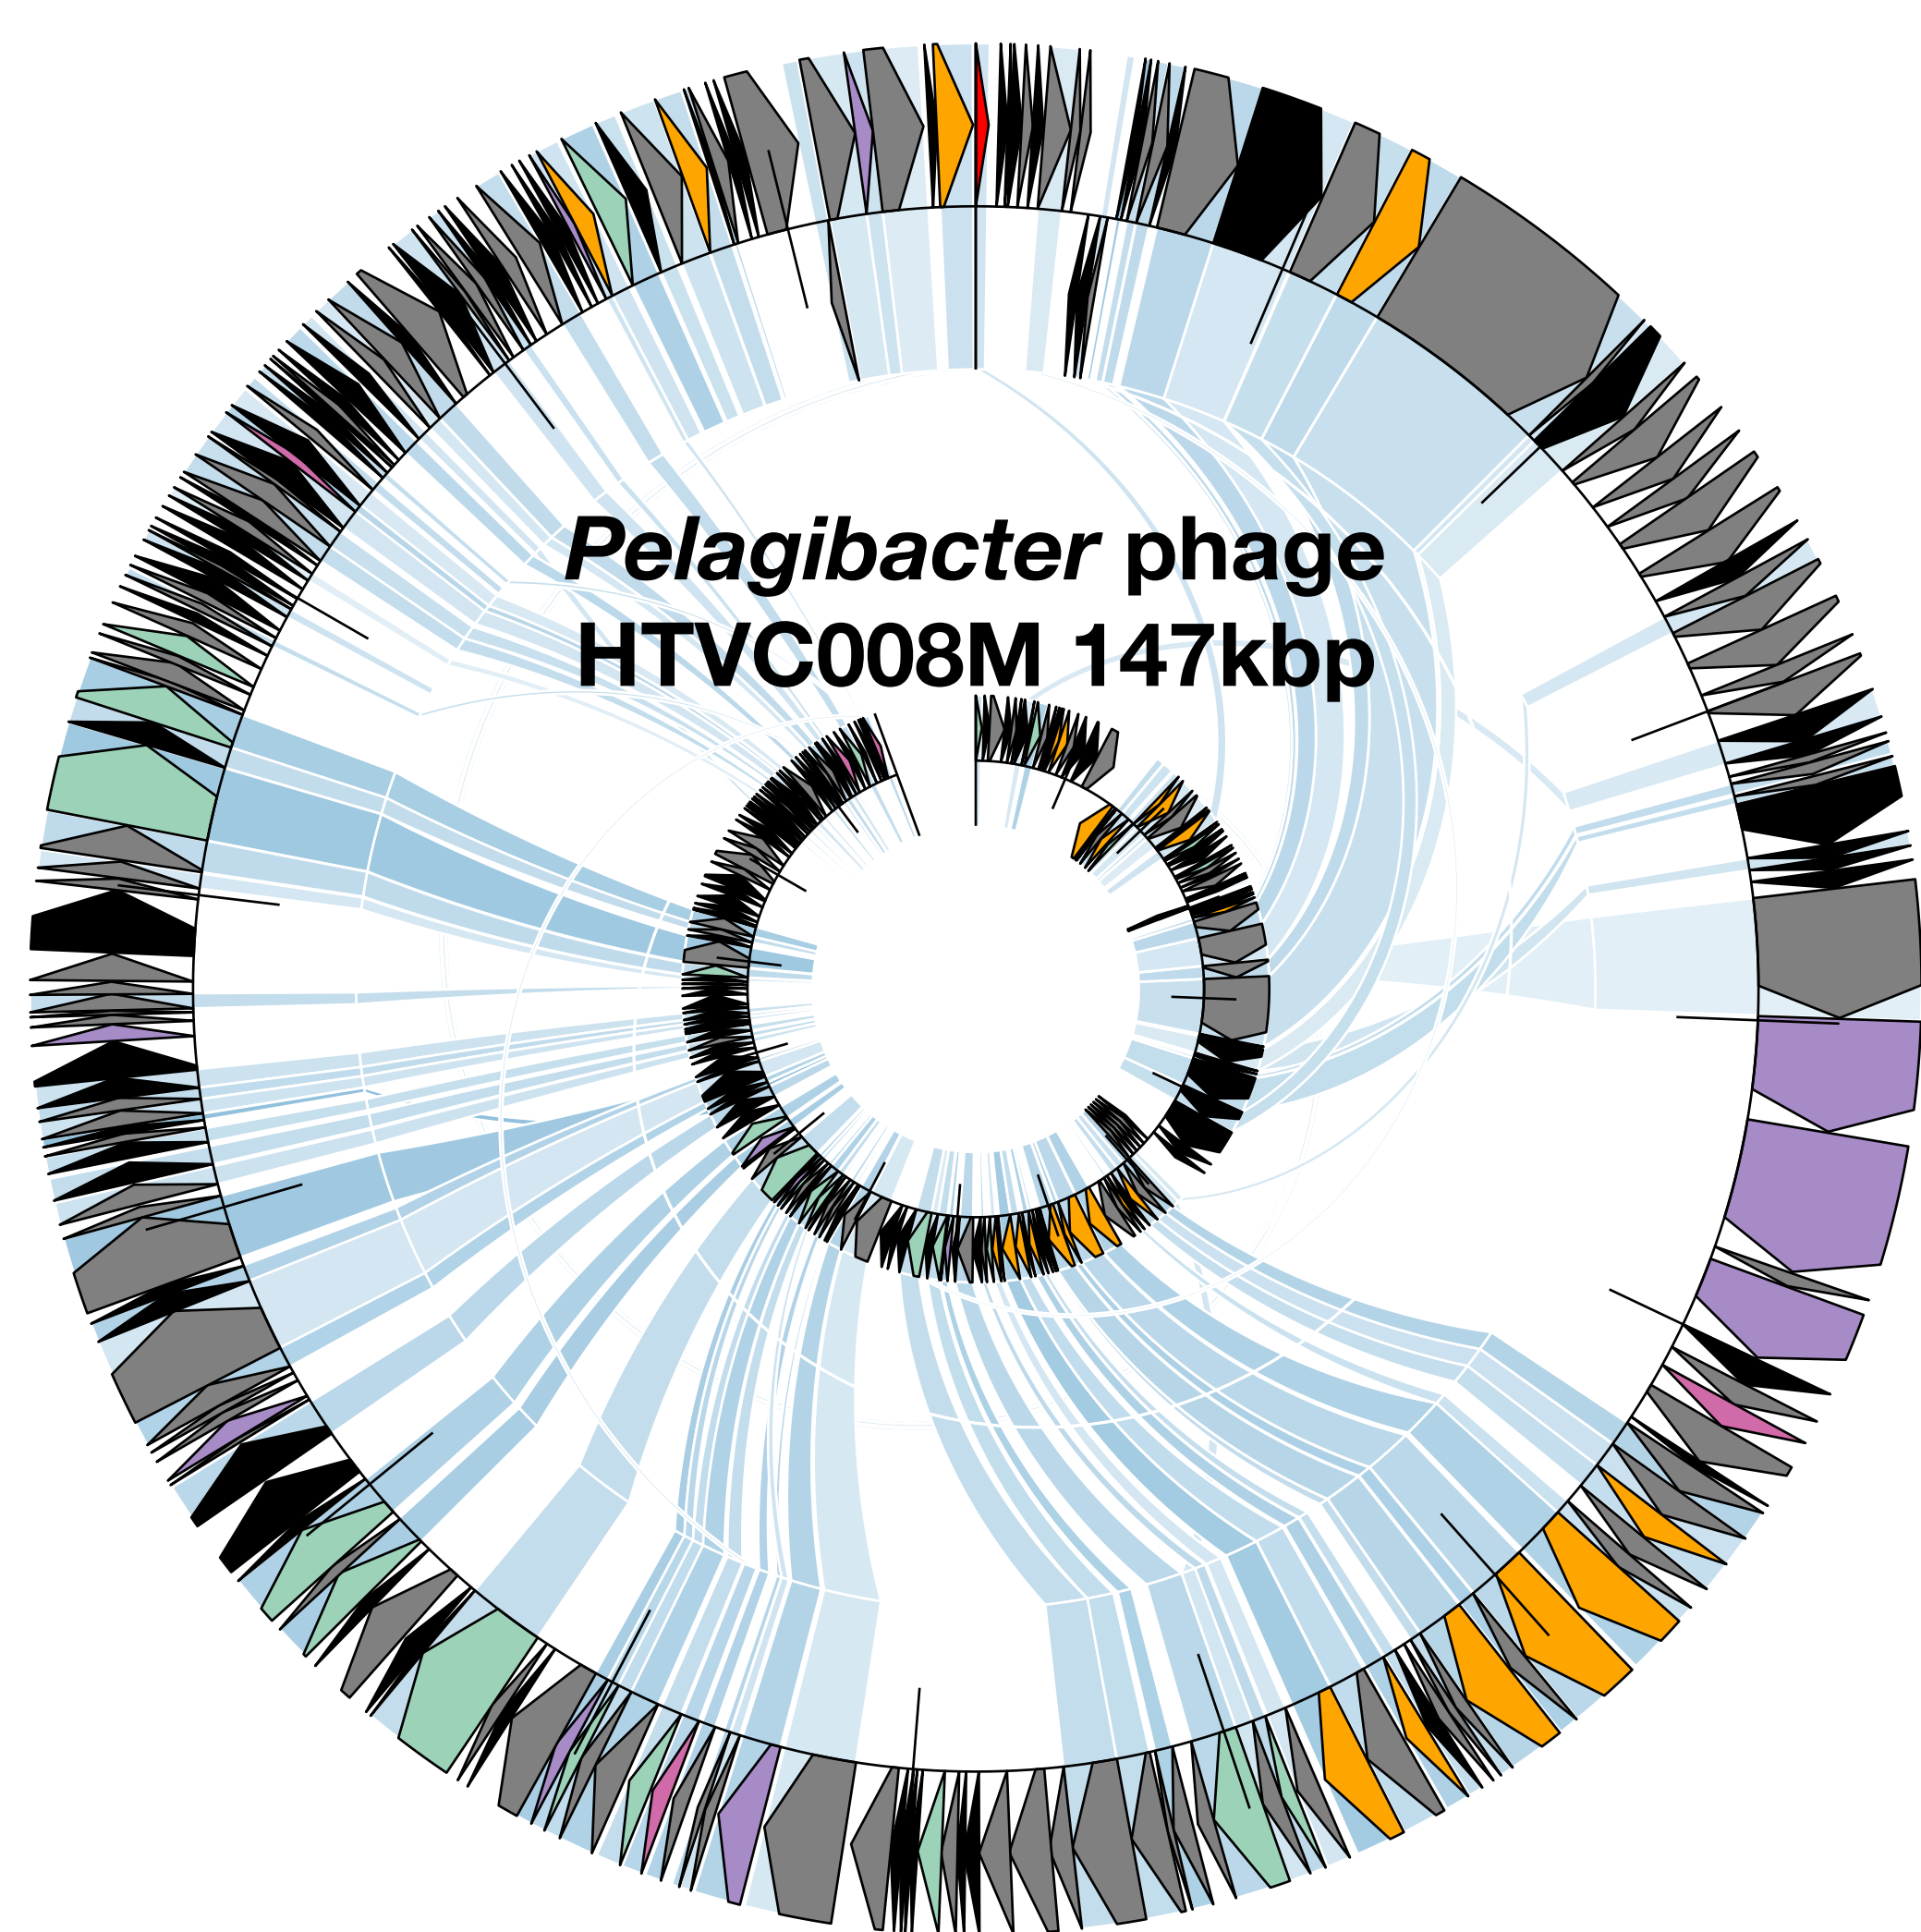

52708. putative SAR11 phage  
complete genome 143kbp

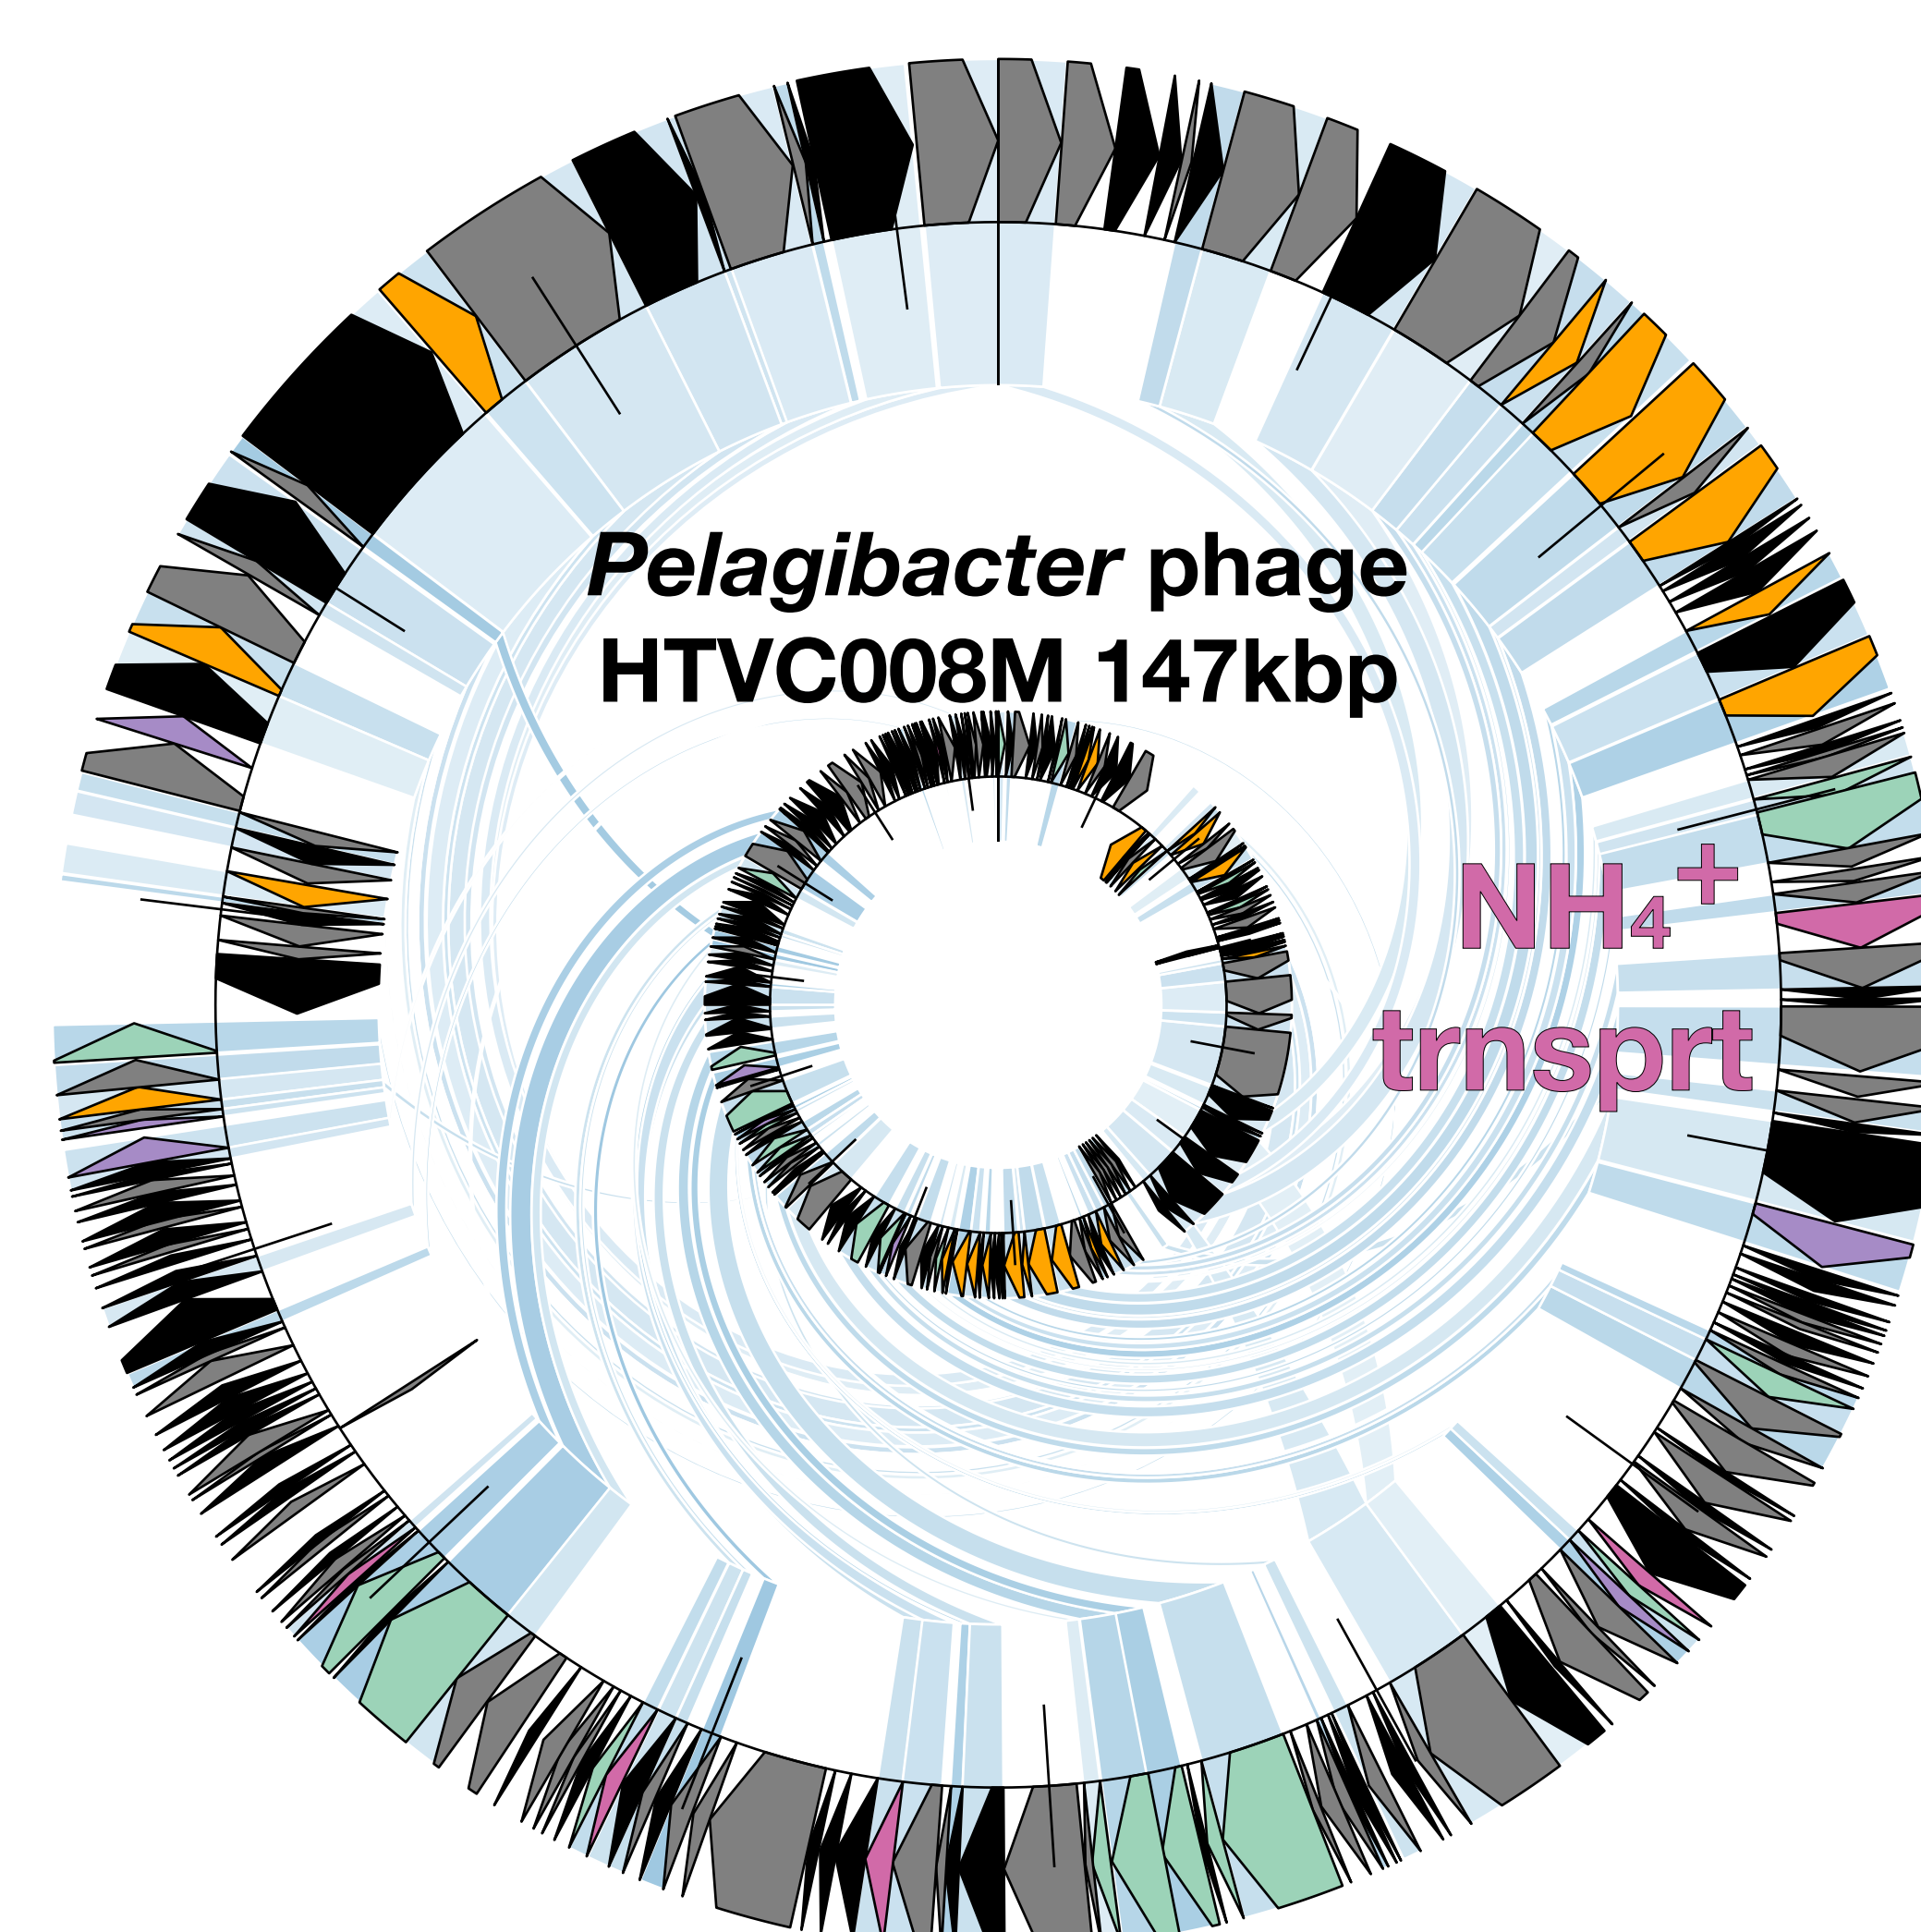

47393. putative SAR11 phage  
complete genome 33kbp

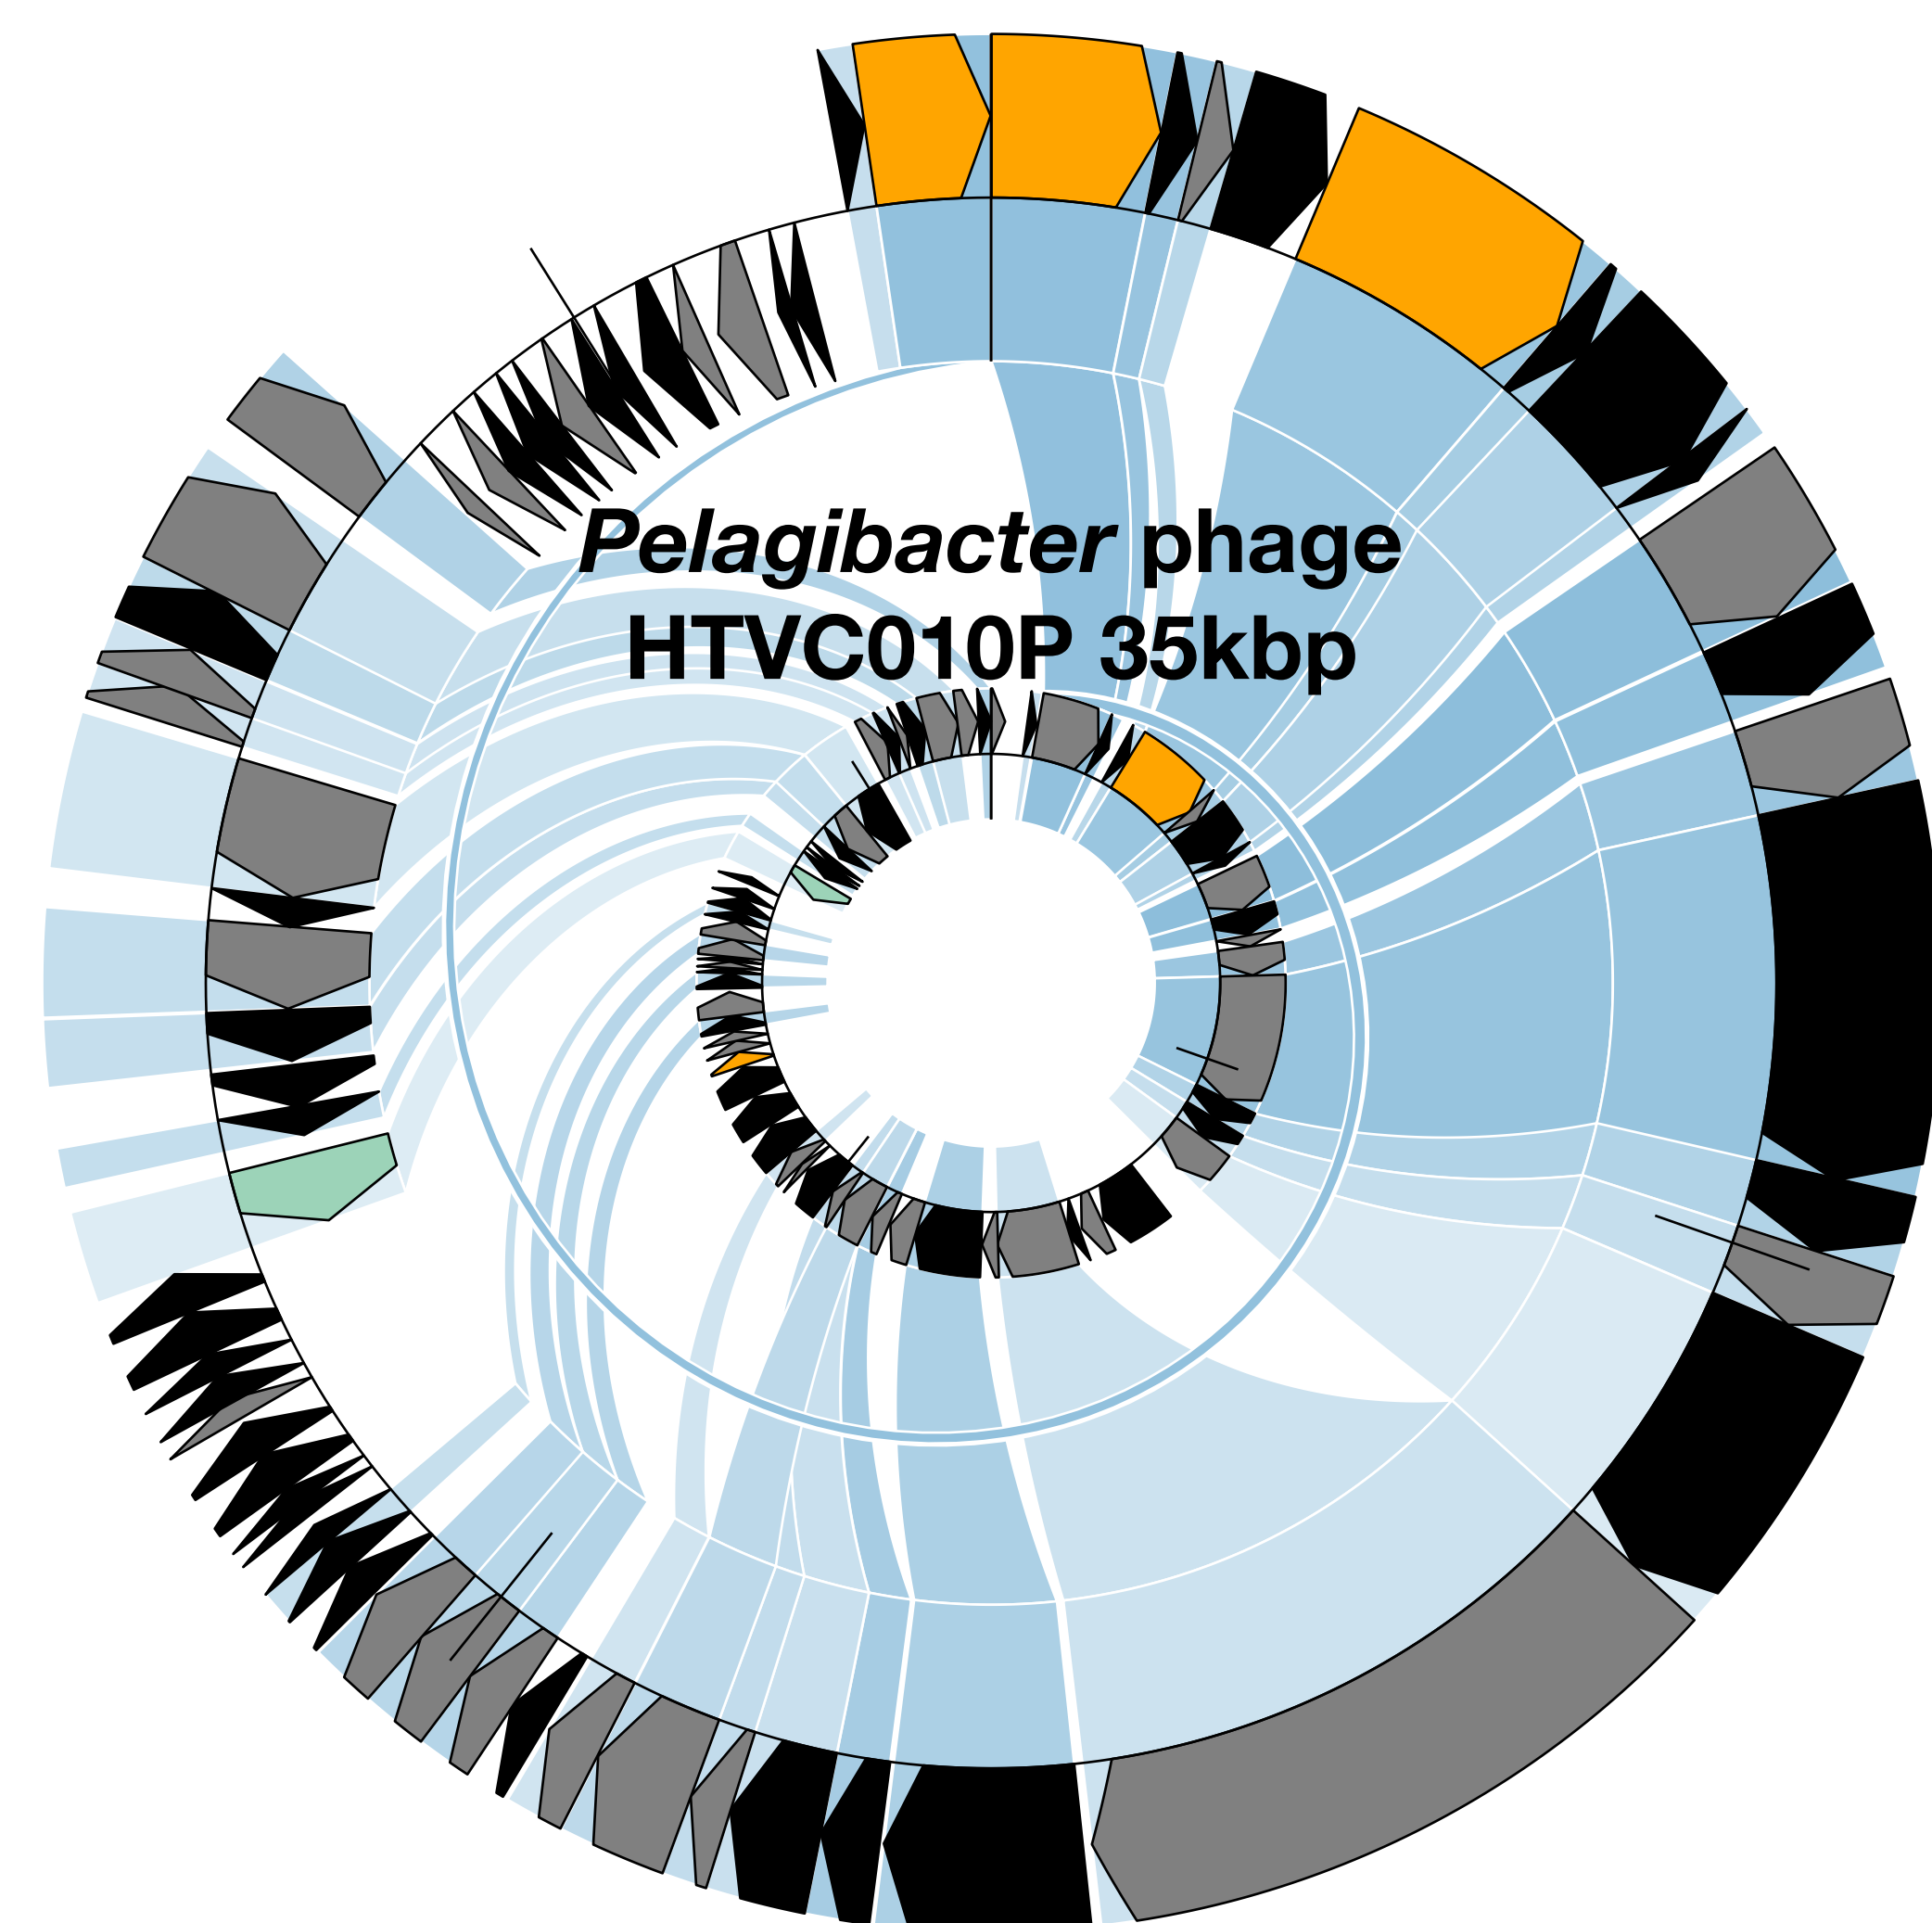

11148. putative archaeal virus  
complete genome 38kbp  
surface

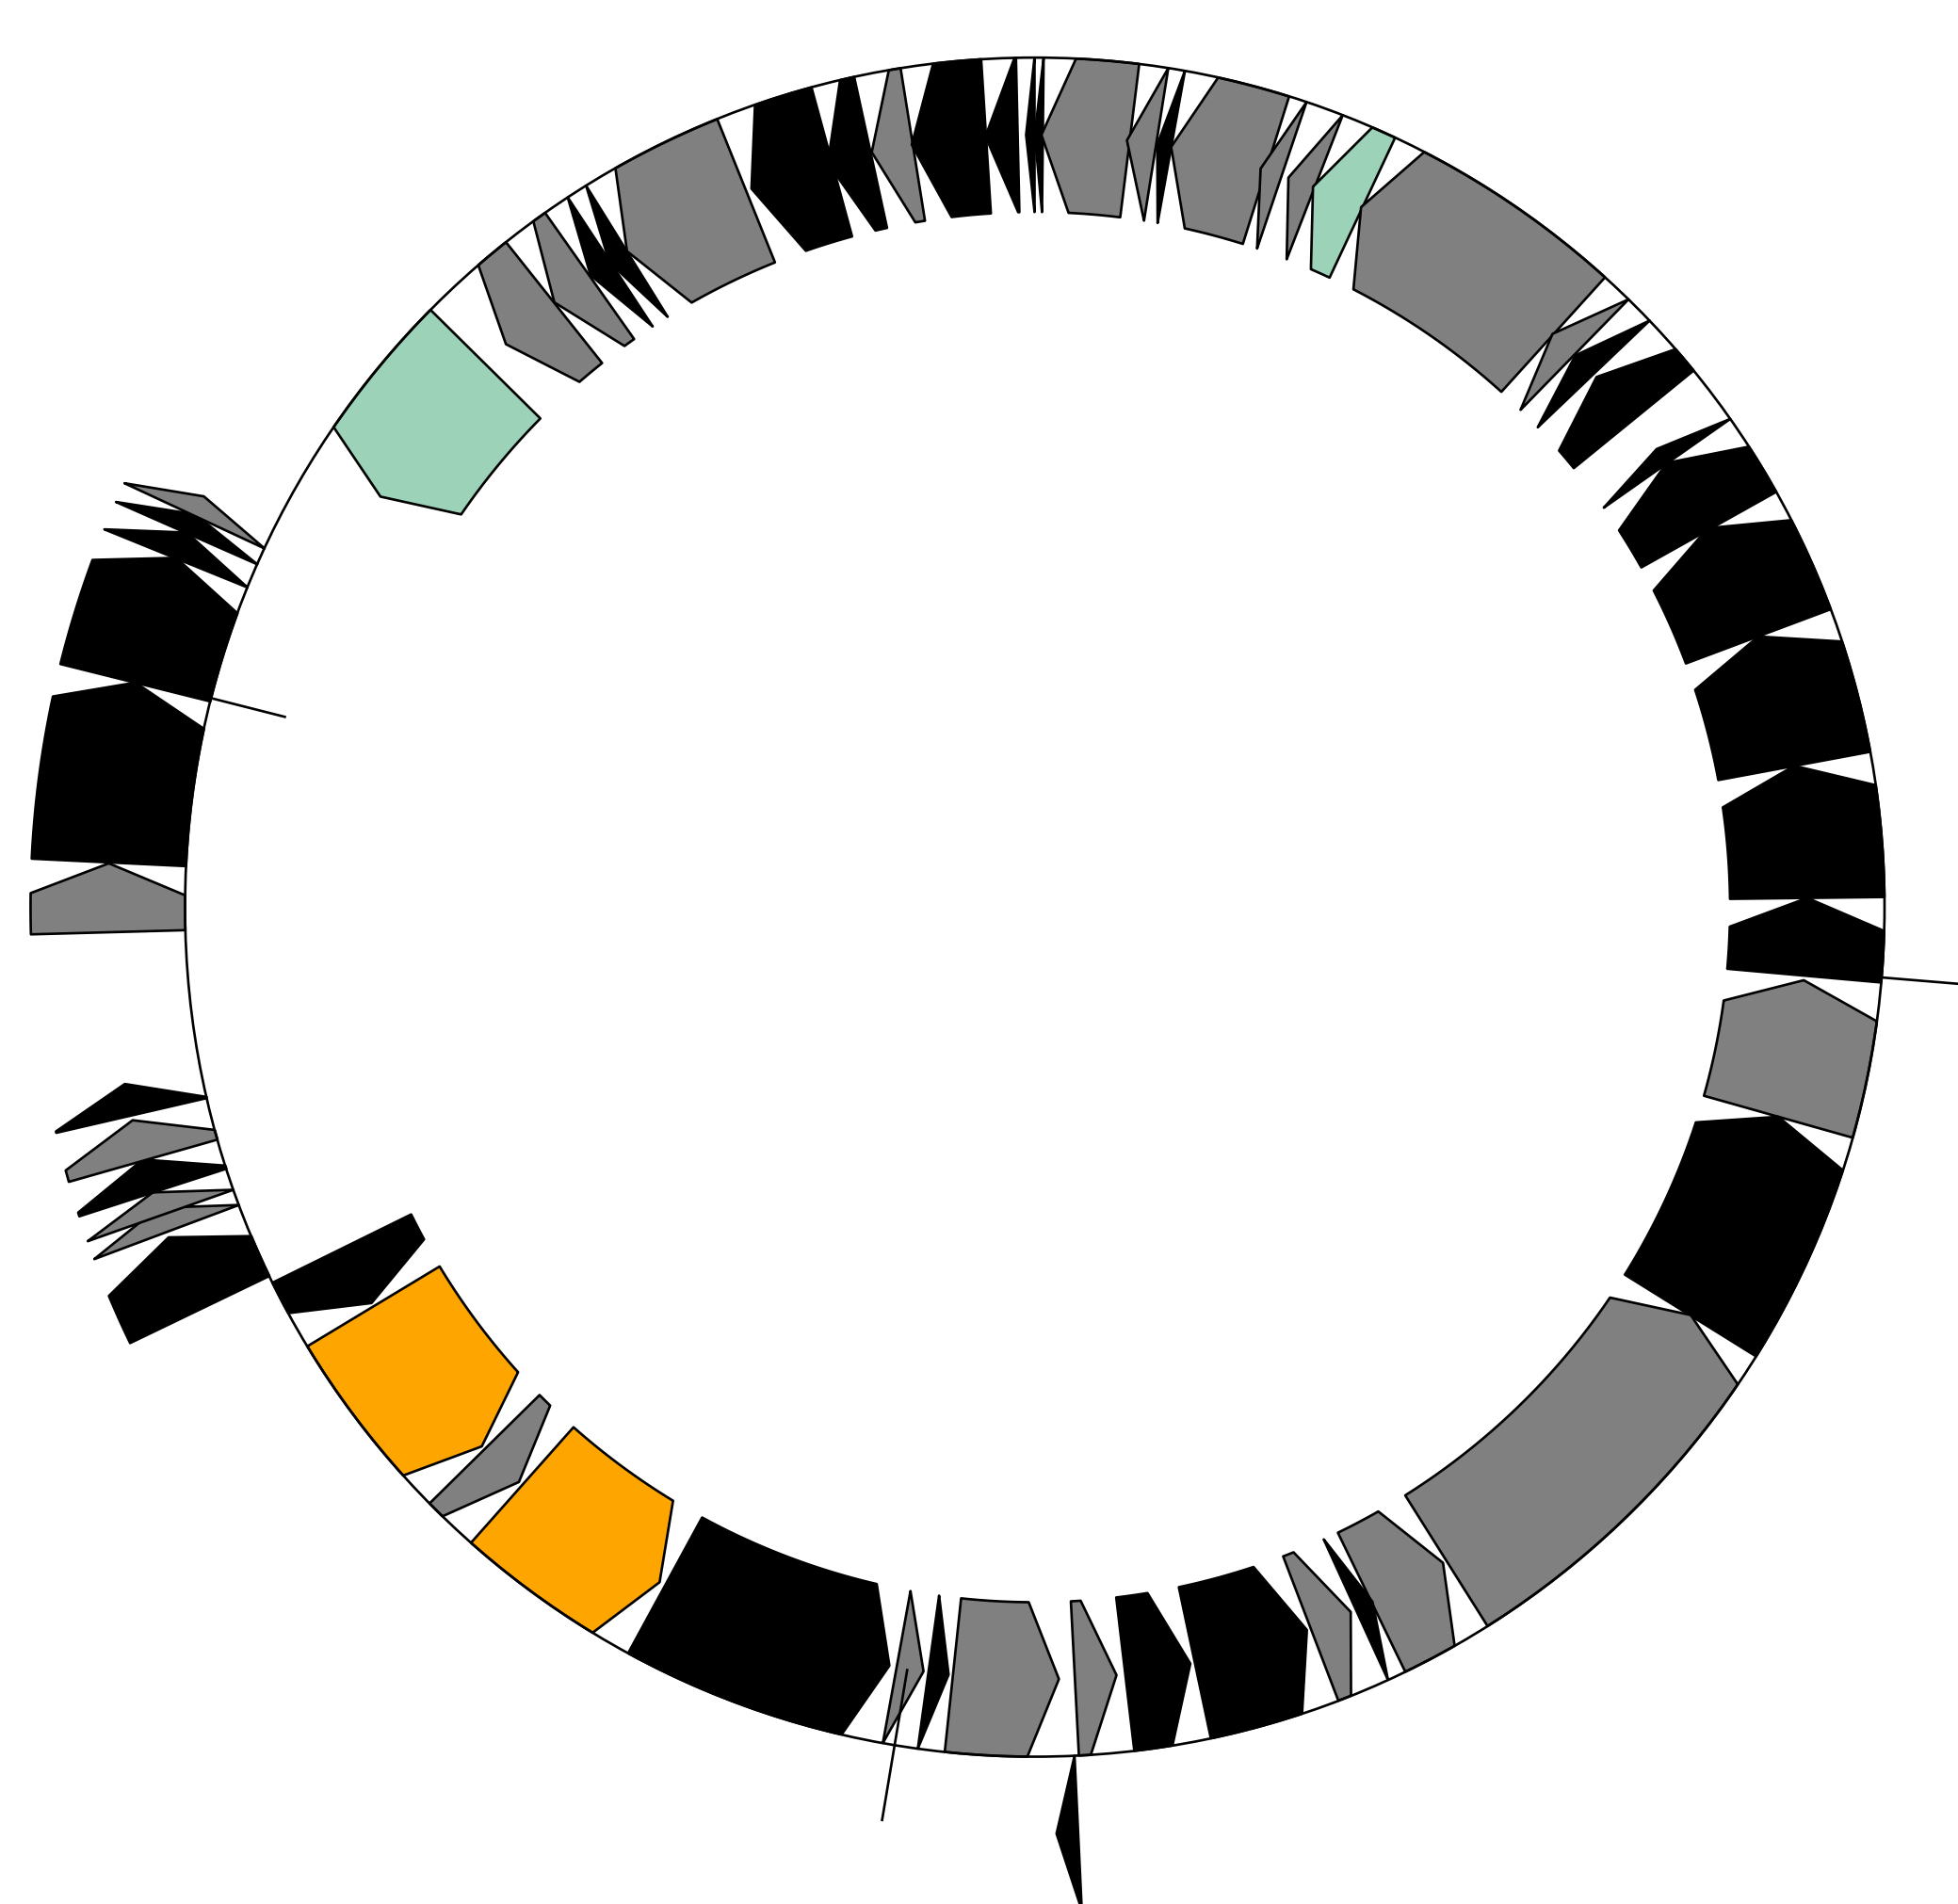

18781. putative Thaumarchaeal virus  
complete genome 69kbp  
below DCM

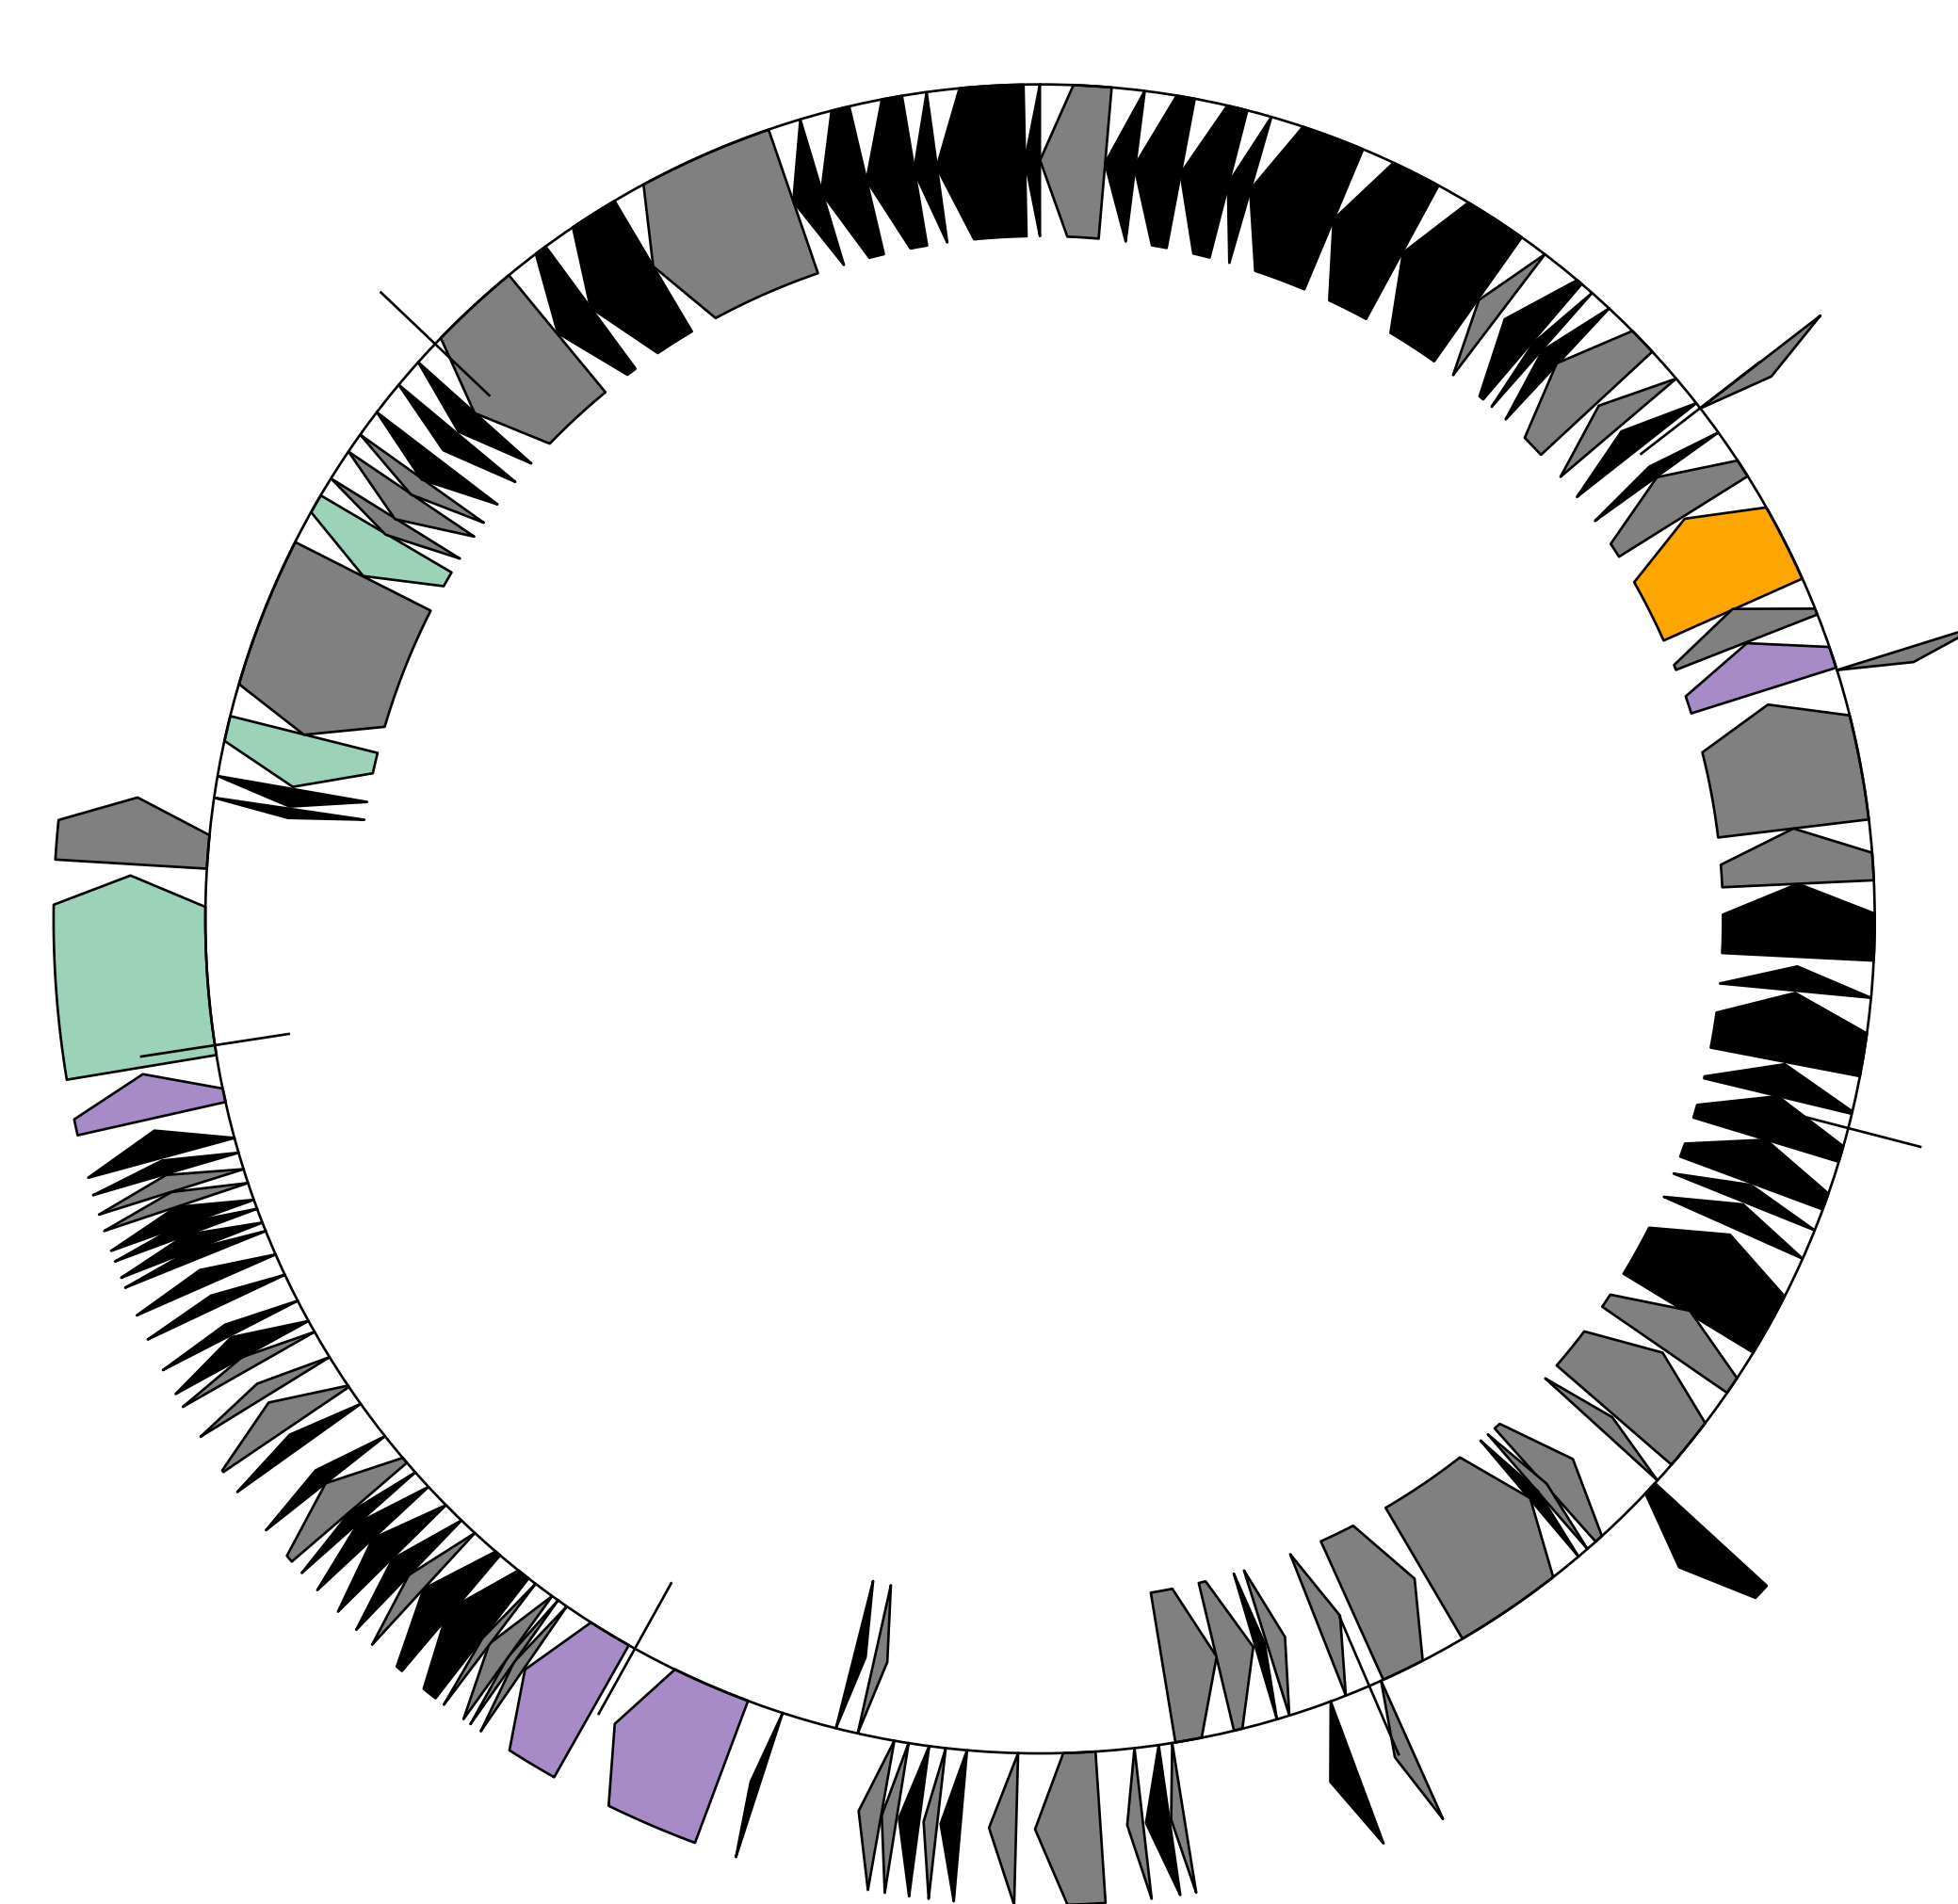

35794. putative Thaumarchaeal virus  
genomic fragment 57kbp  
below DCM

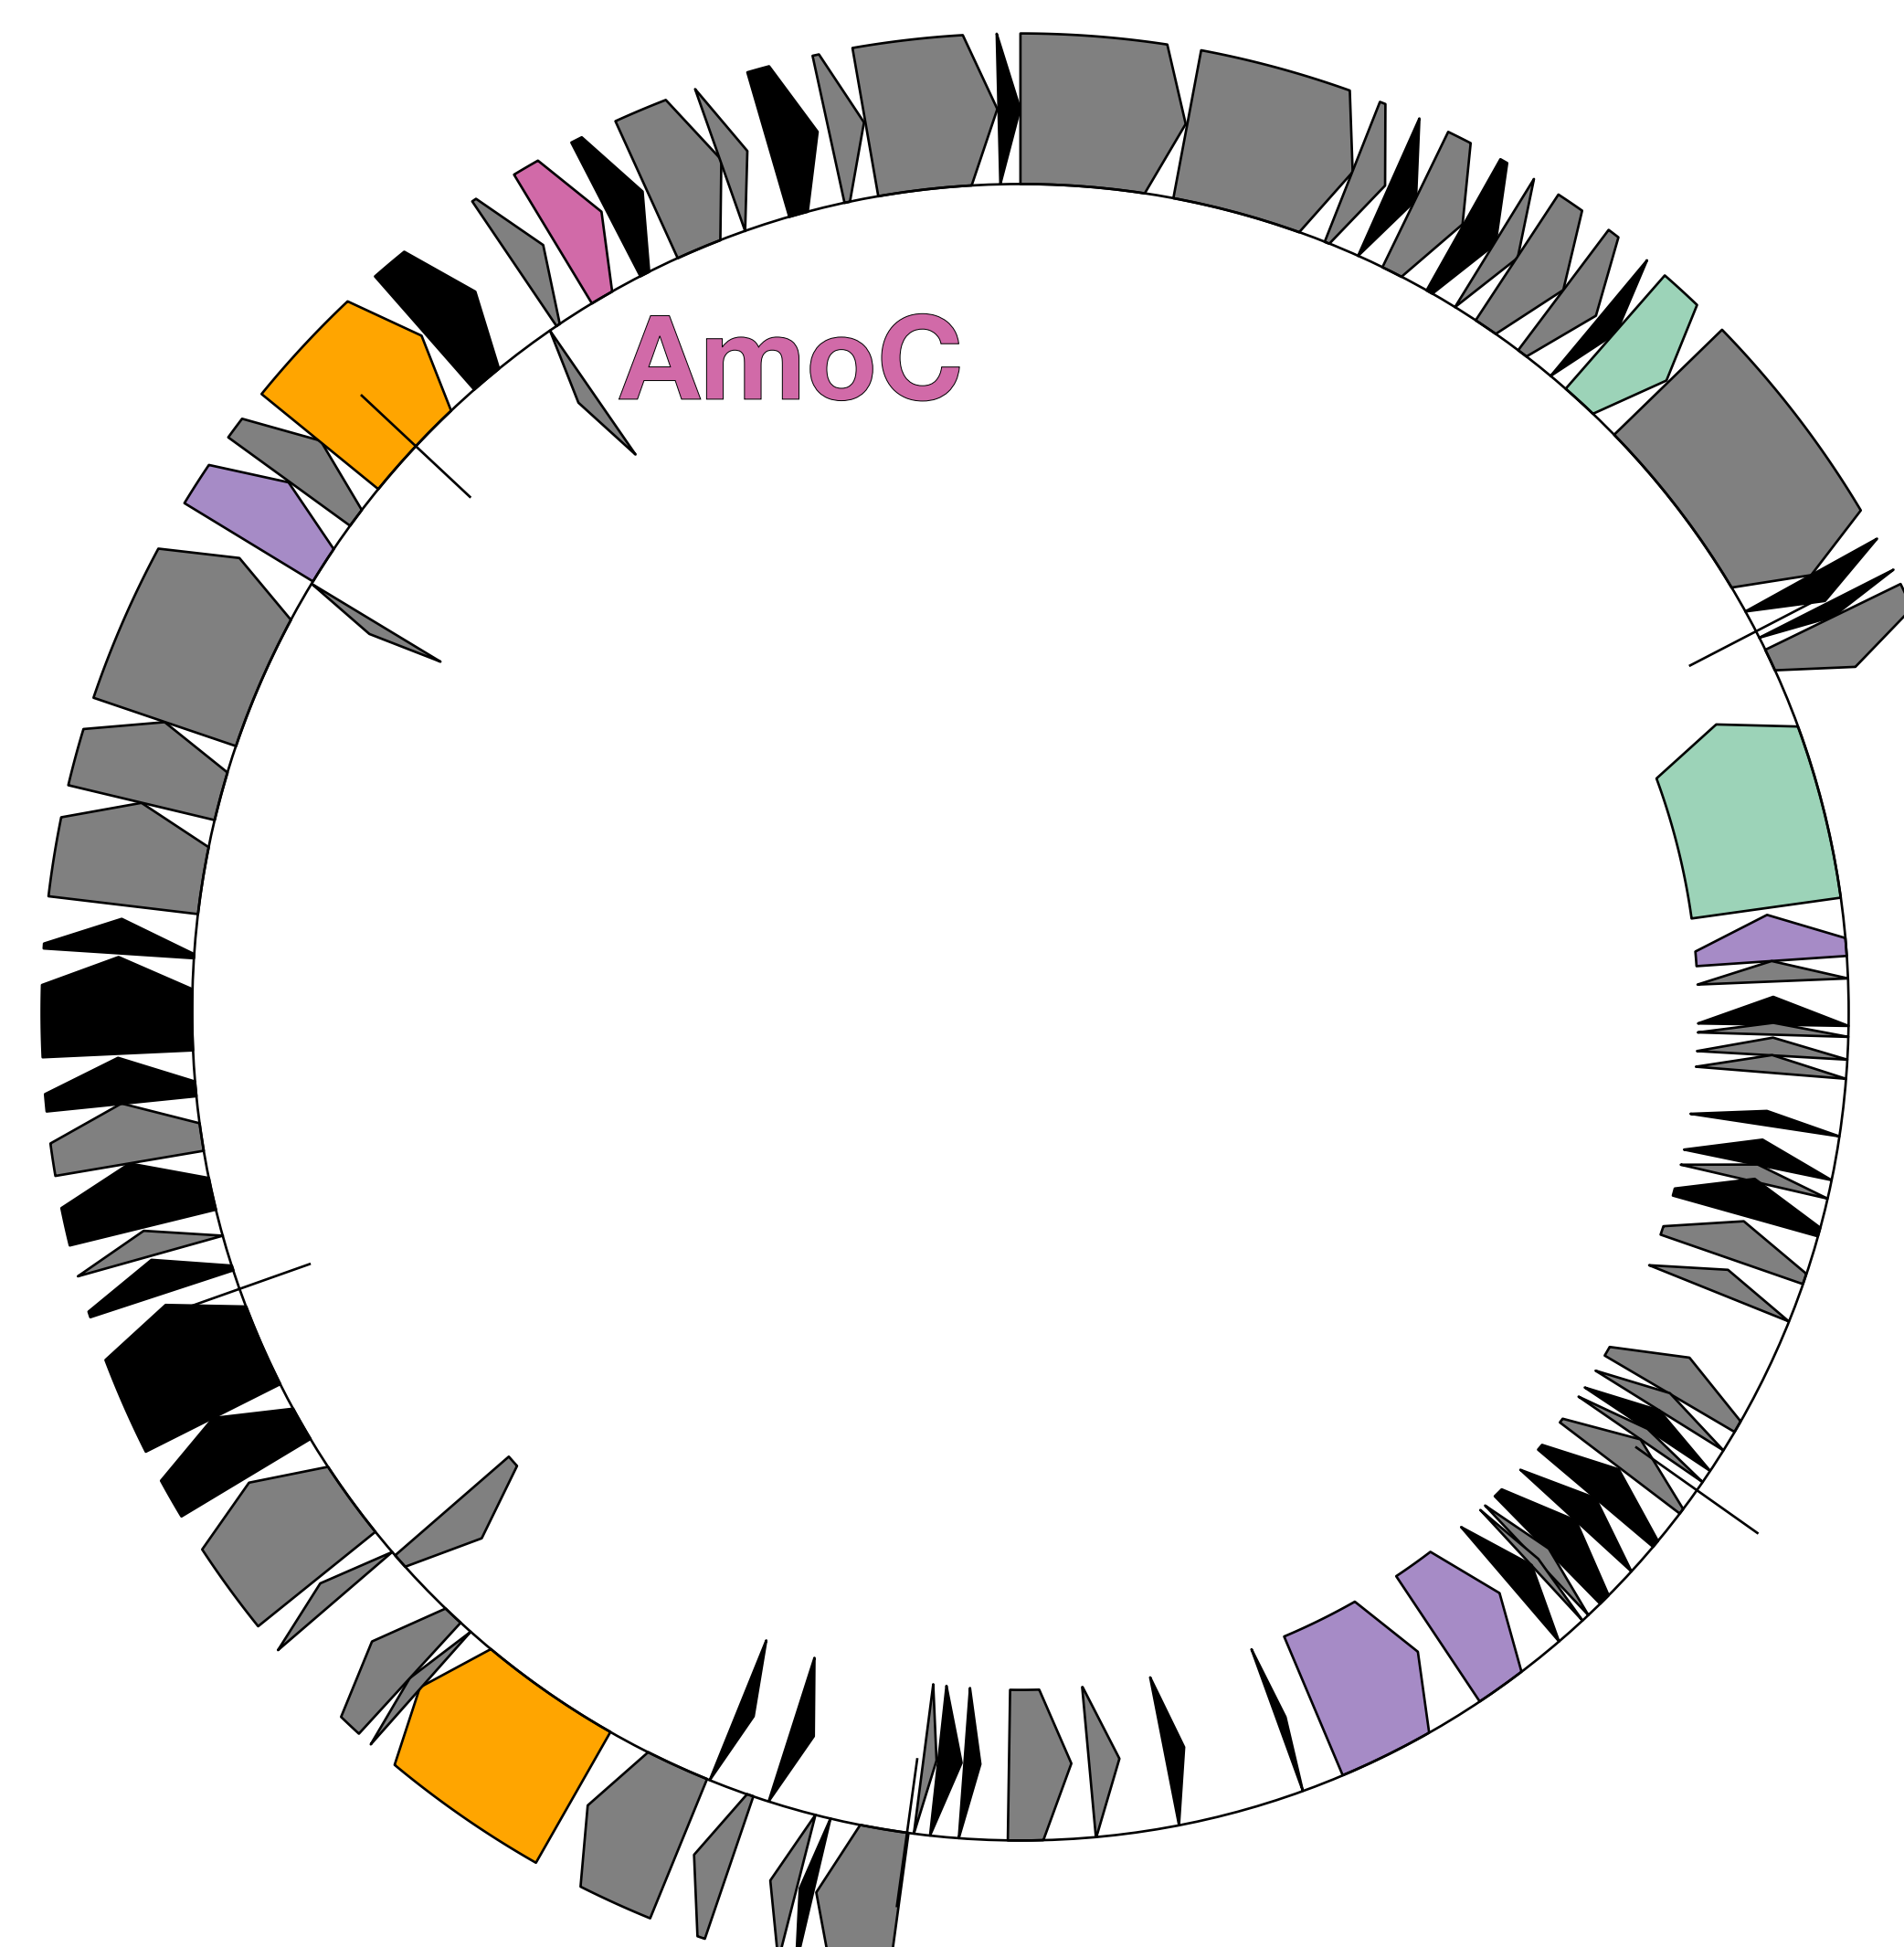

56434. putative *Bathycoccus* virus  
genomic fragment 68kbp

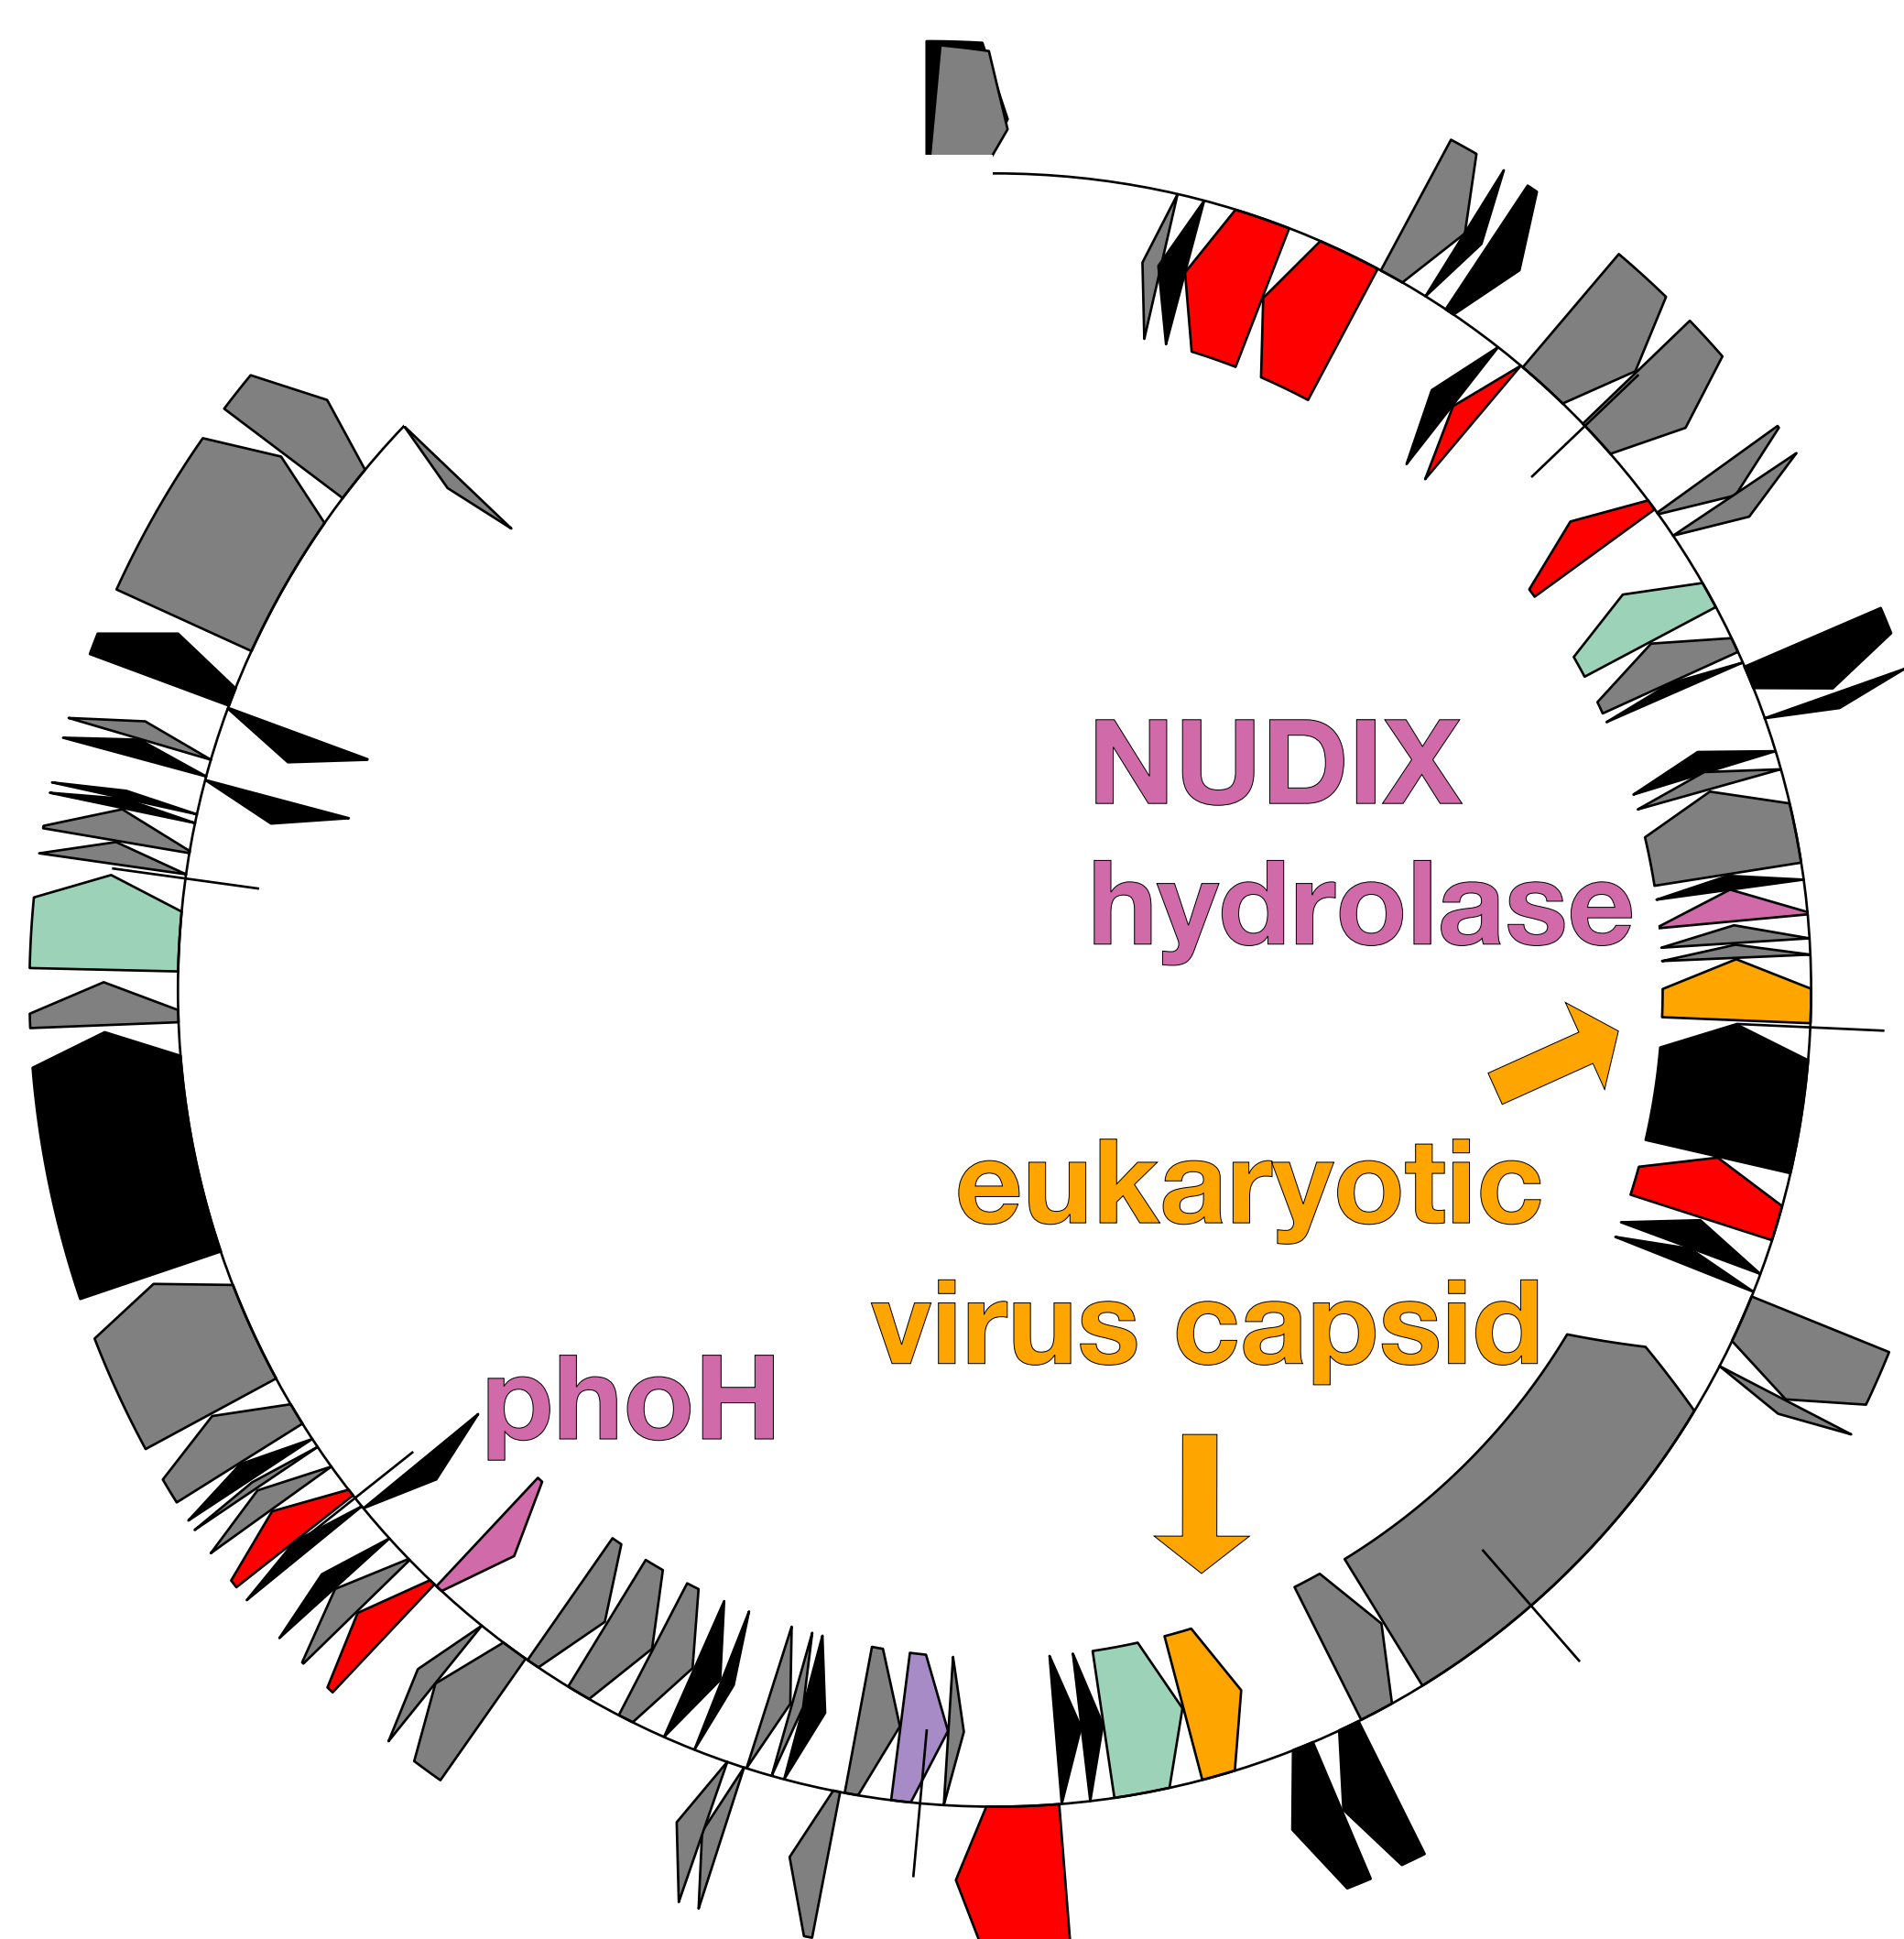

5712. putative *Synechococcus* phage  
complete genome 39kbp  
most abundant phage in cell fraction

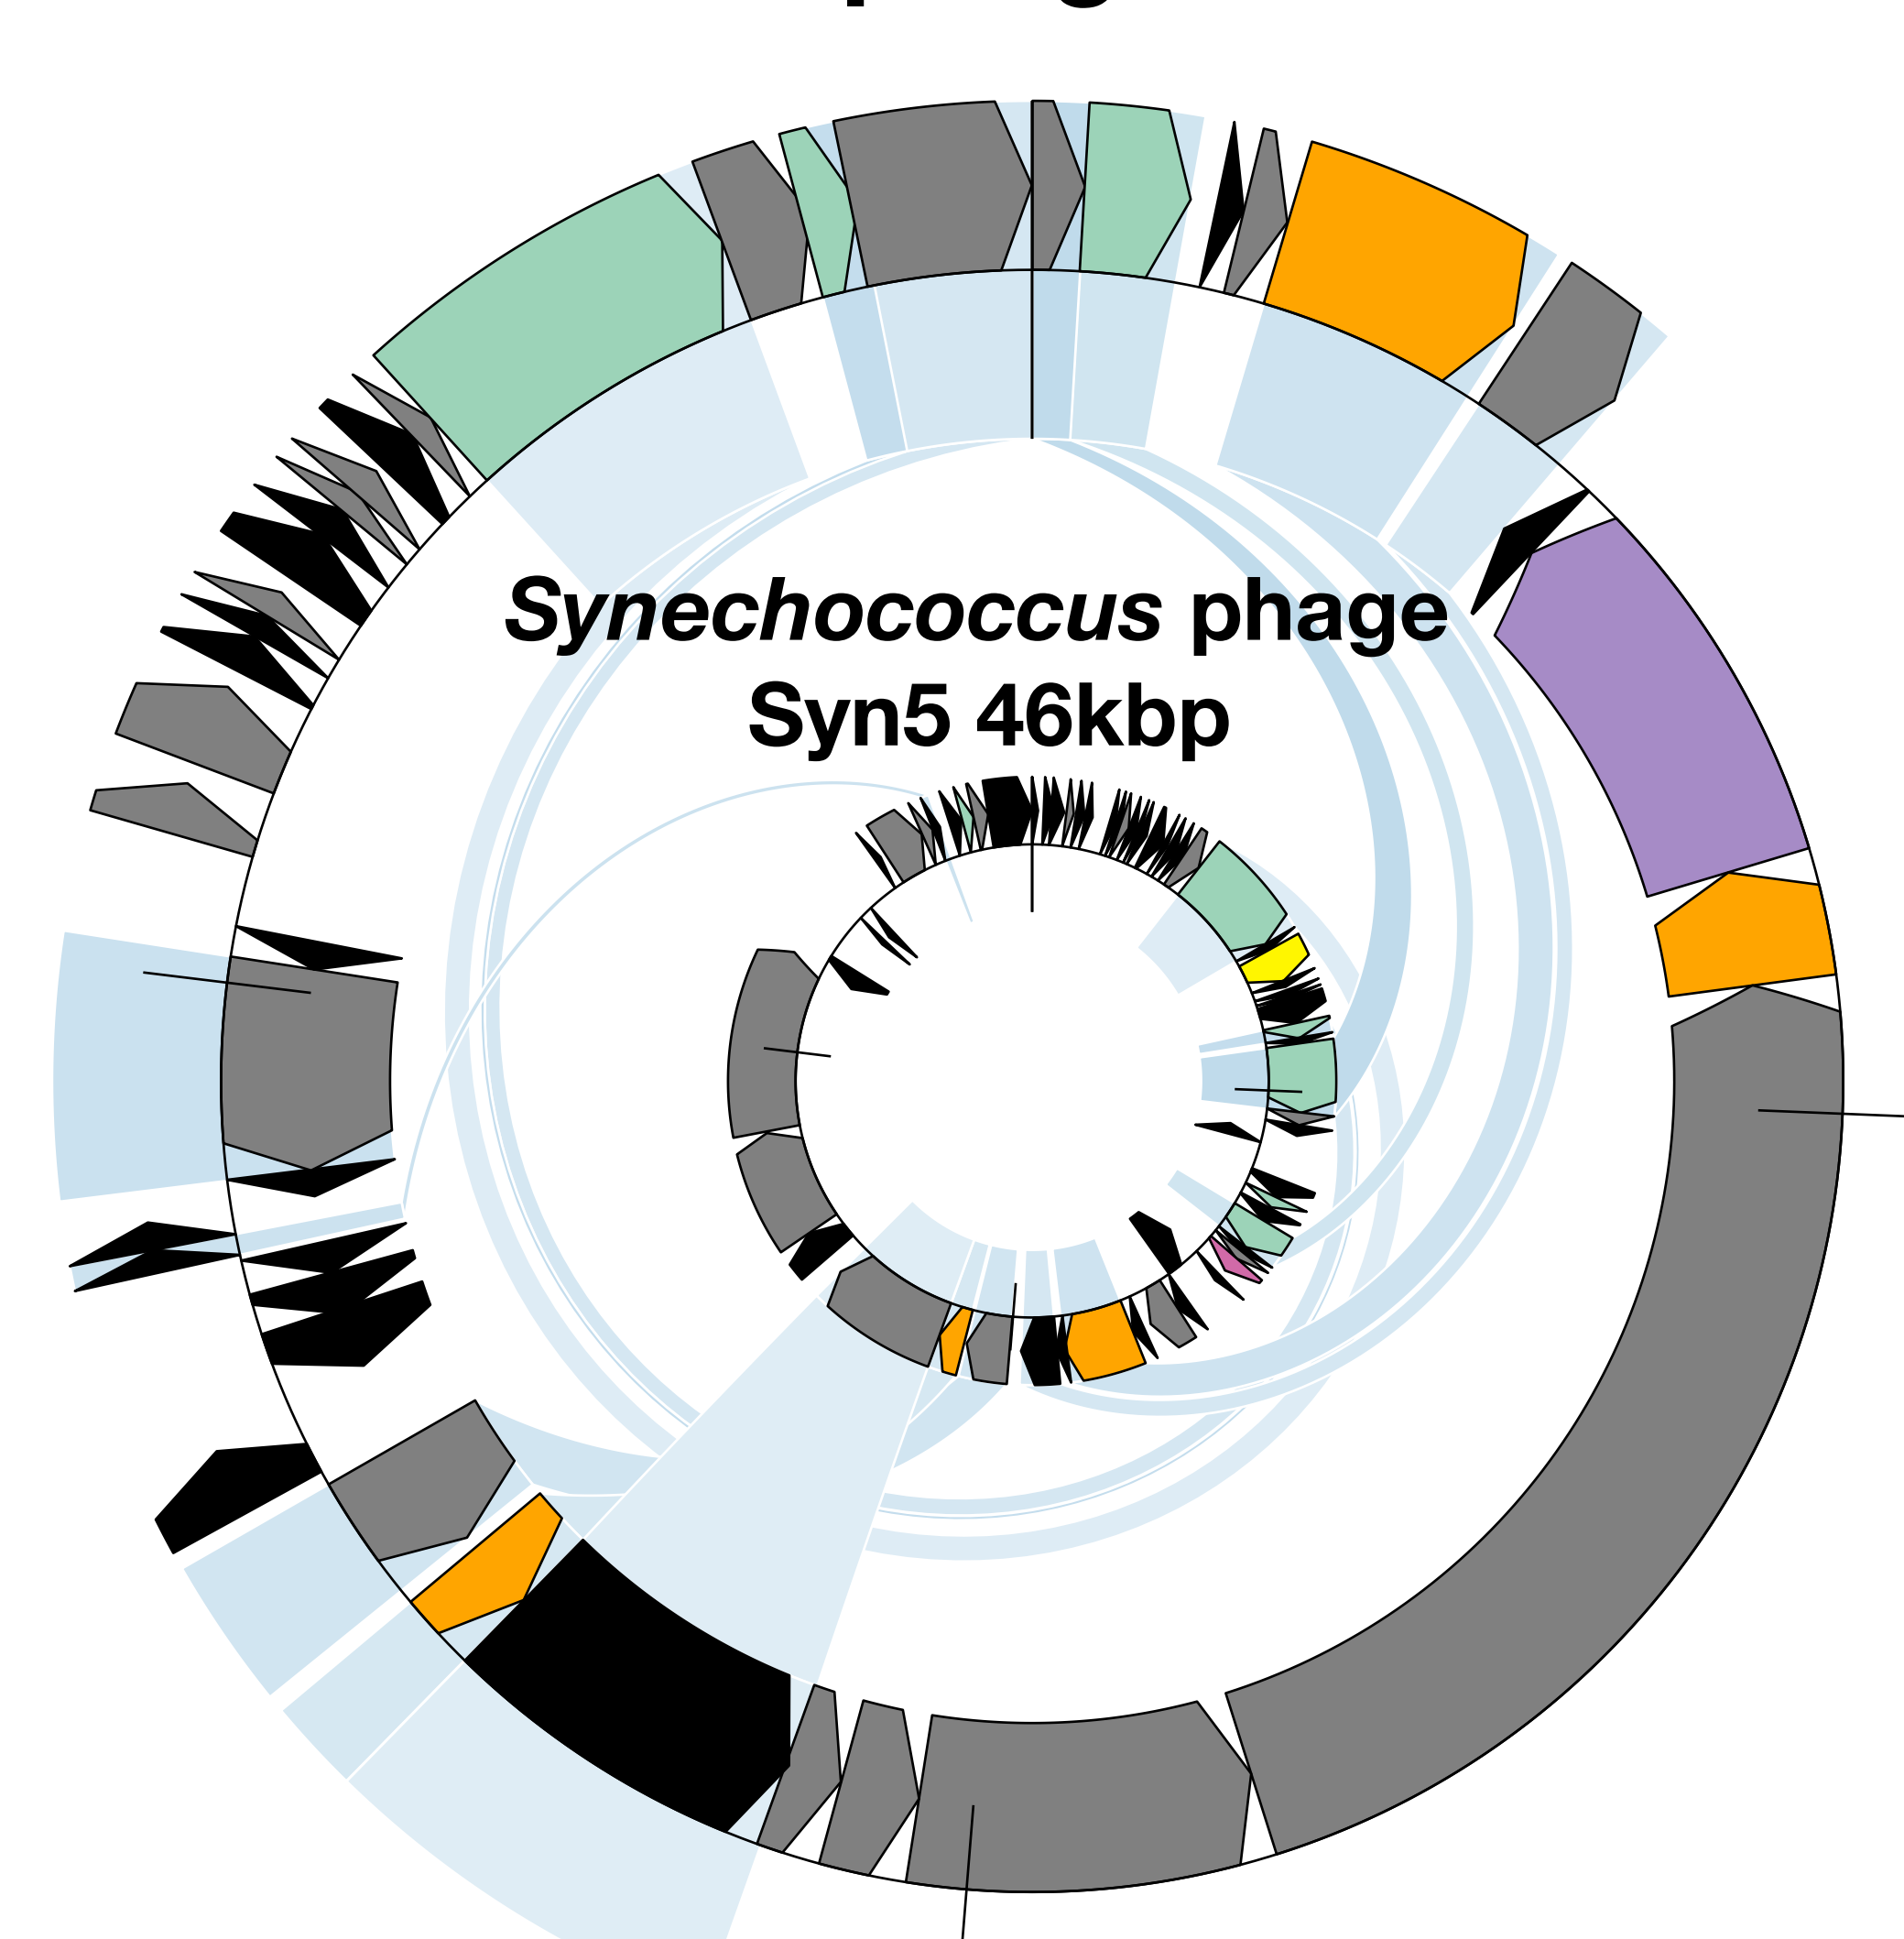

30150. putative *Synechococcus* phage  
genomic fragment 58kbp

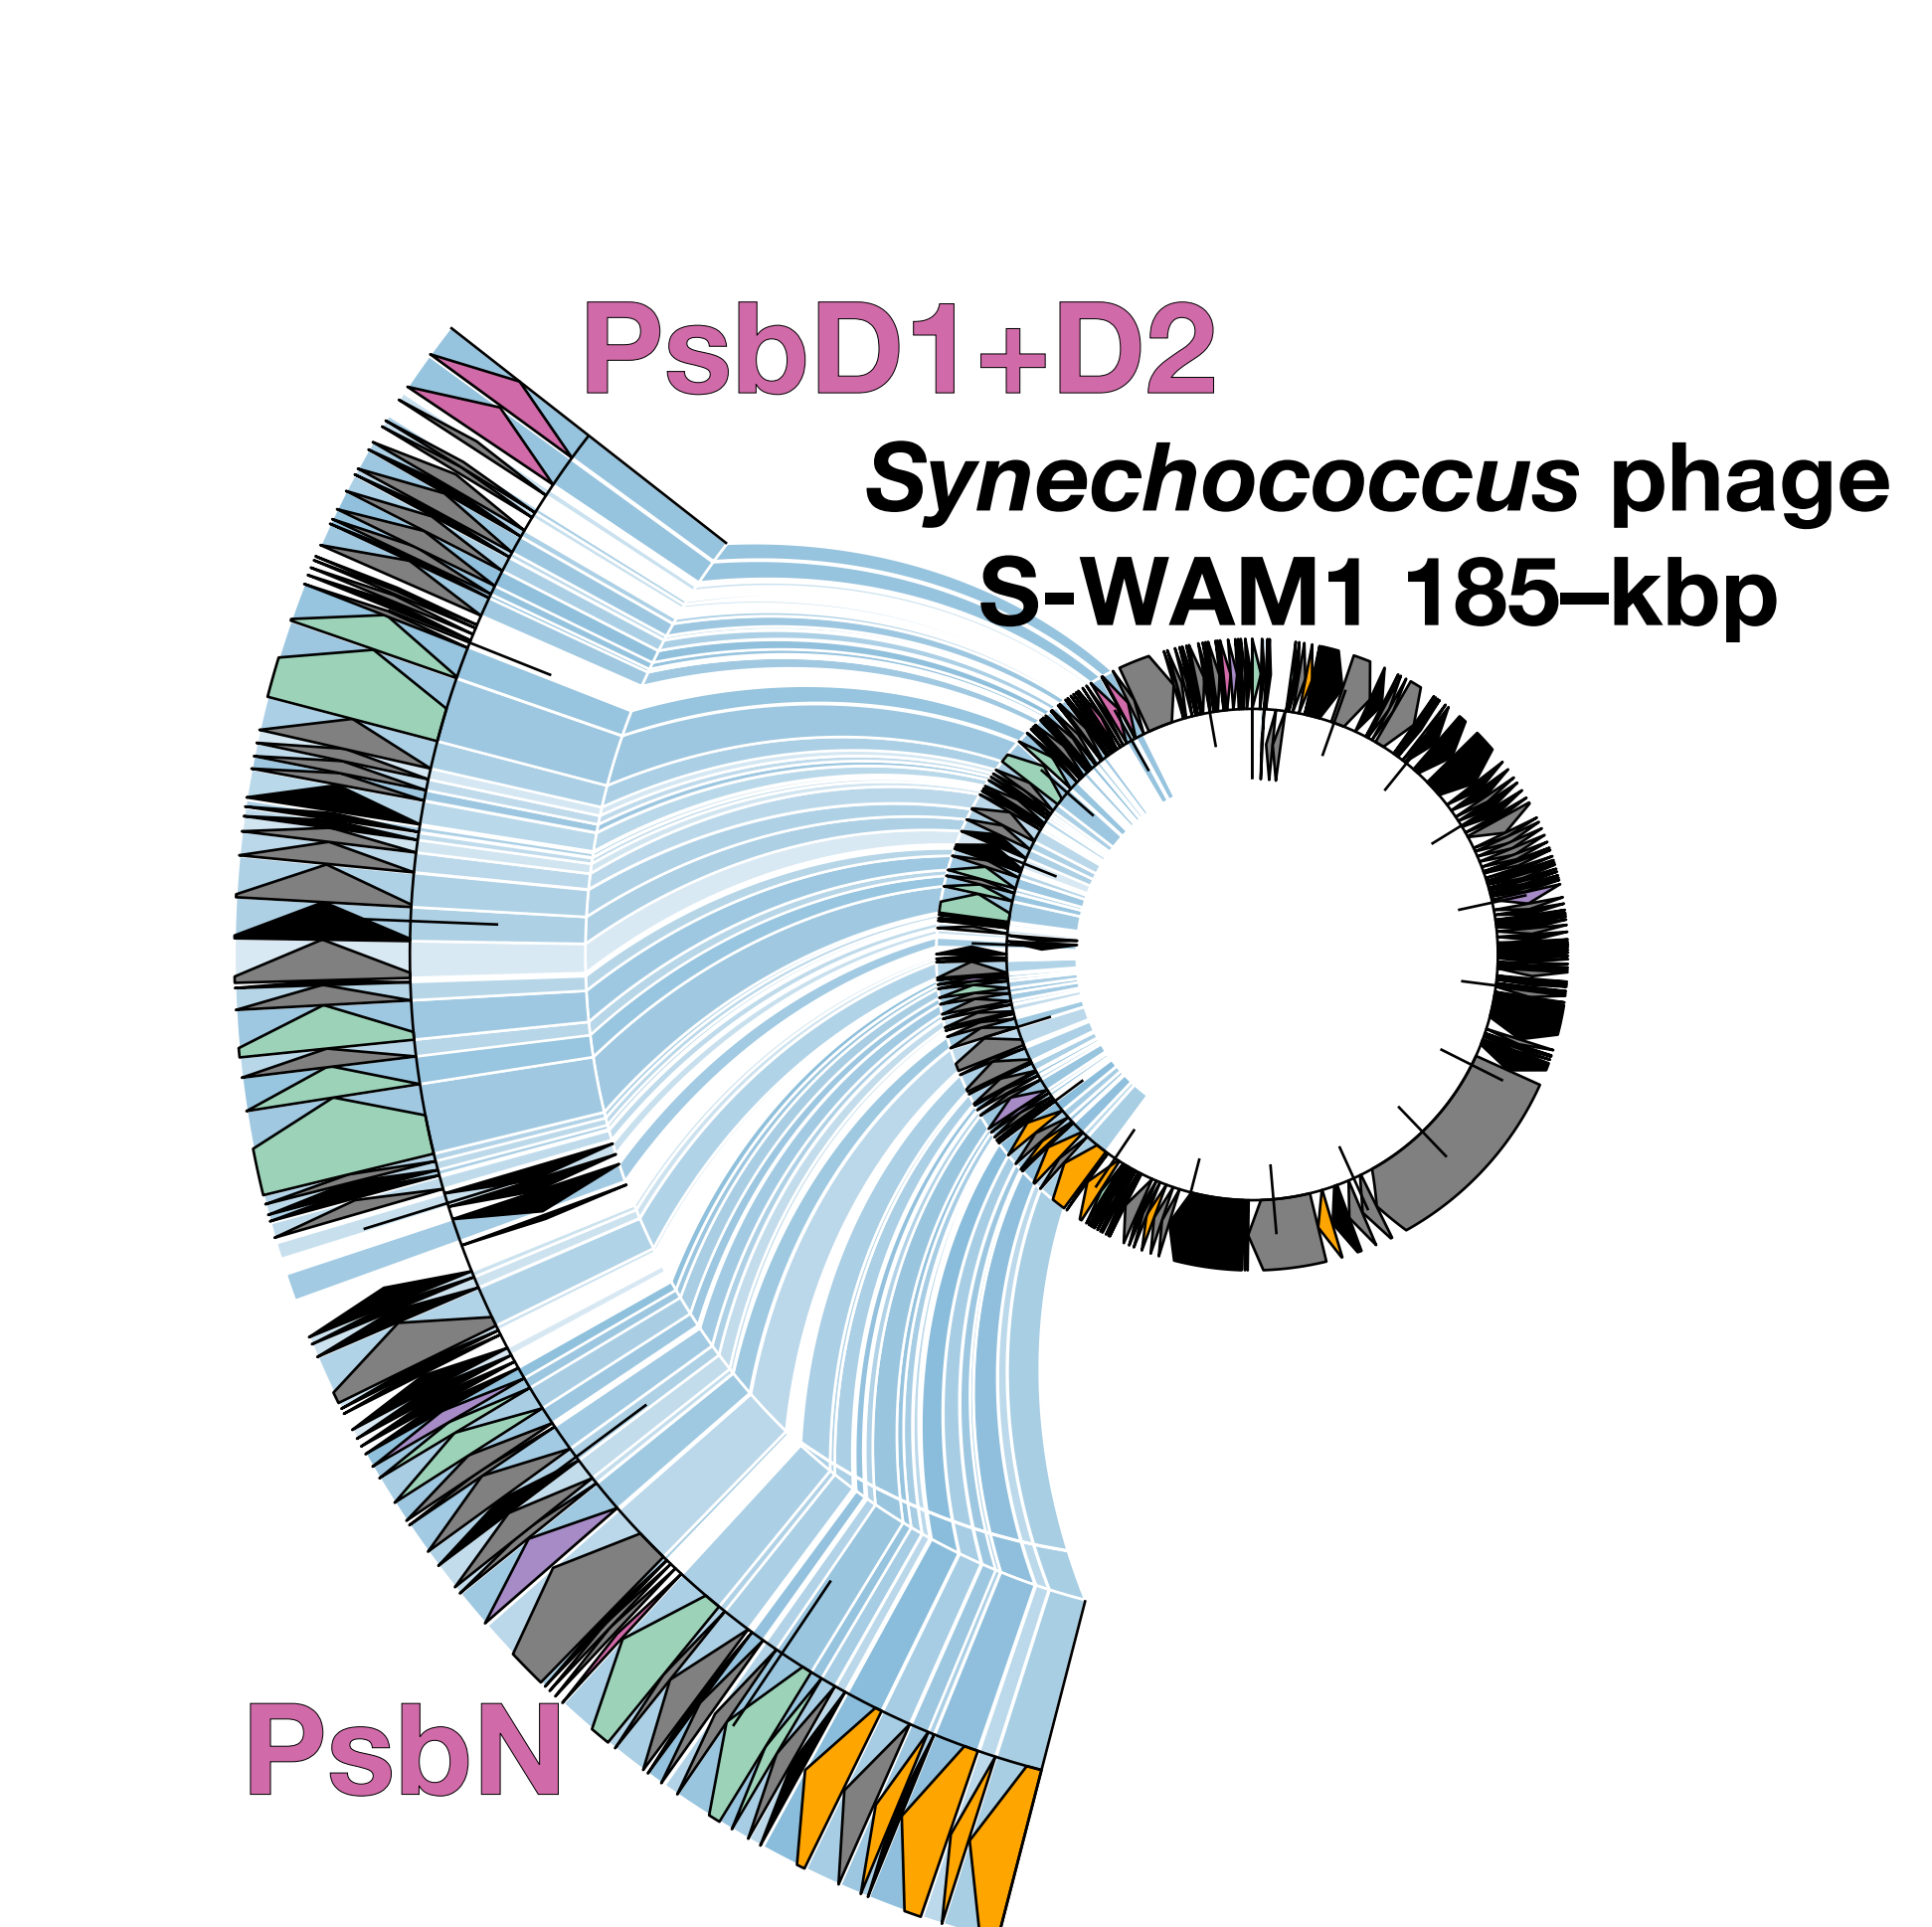

47103. putative *Prochlorococcus* phage  
complete genome 36kbp  
most abundant phage in viral fraction

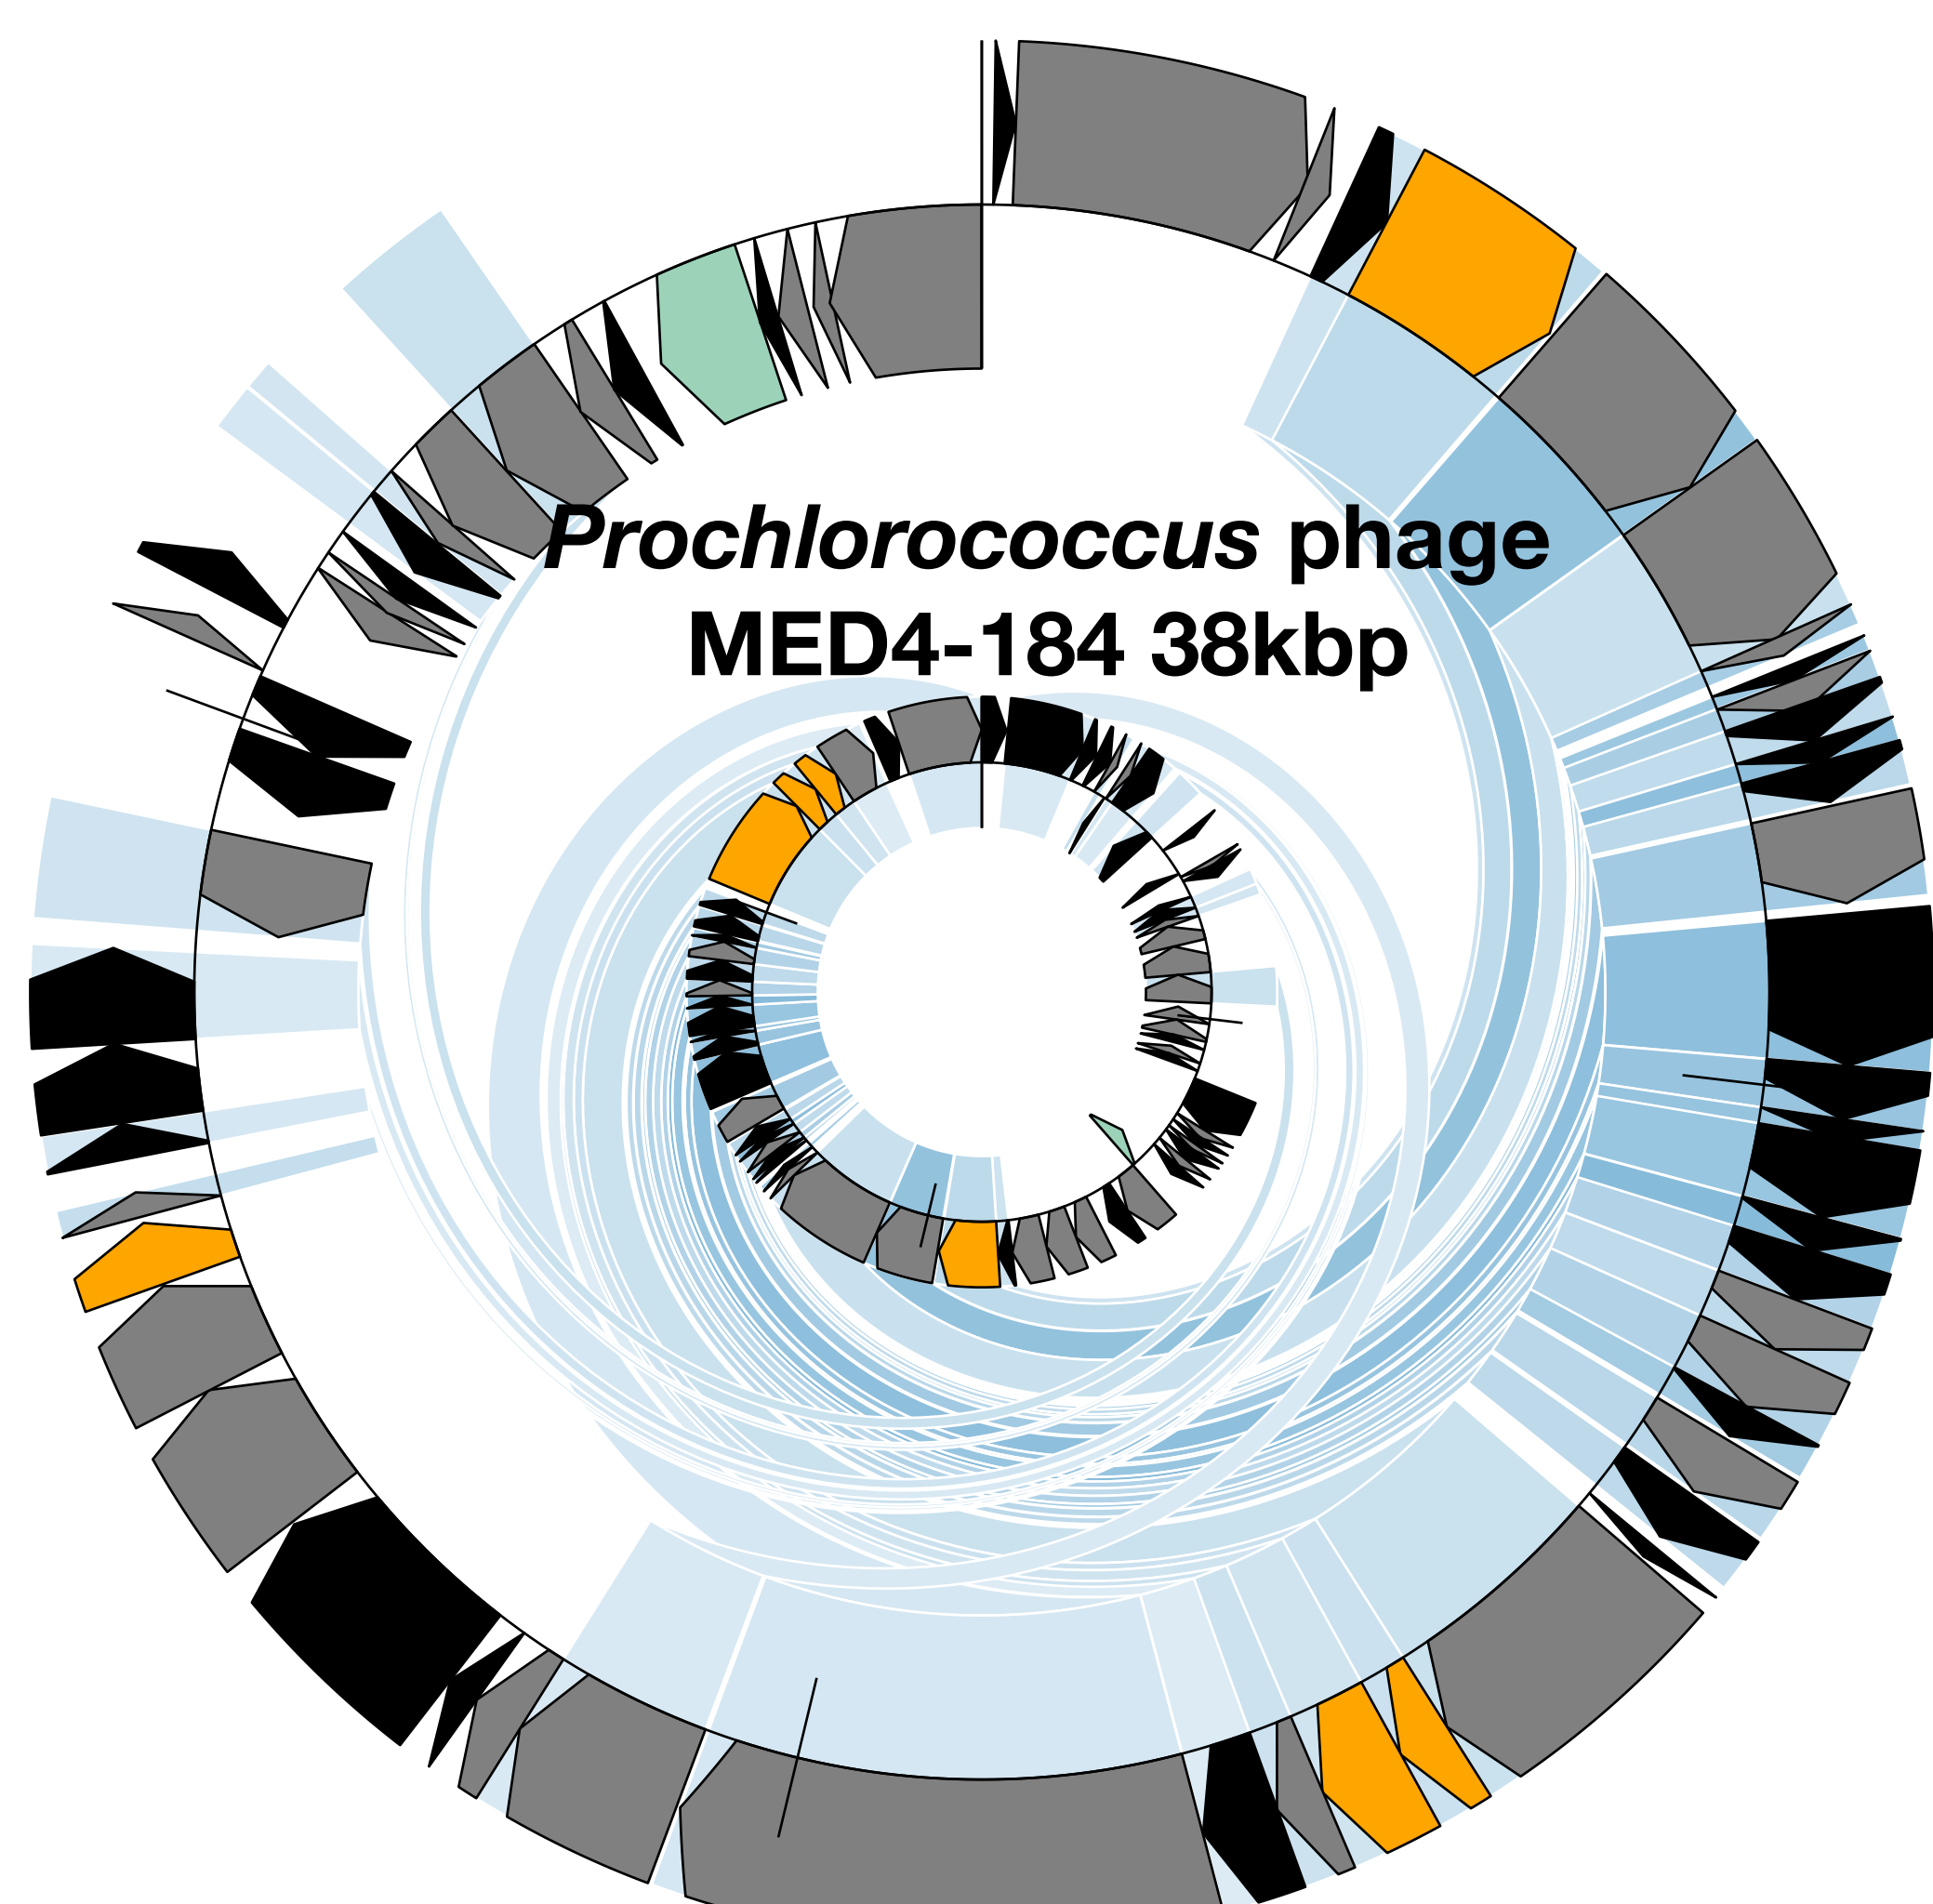

24463. putative *Prochlorococcus* phage  
complete genome 37kbp

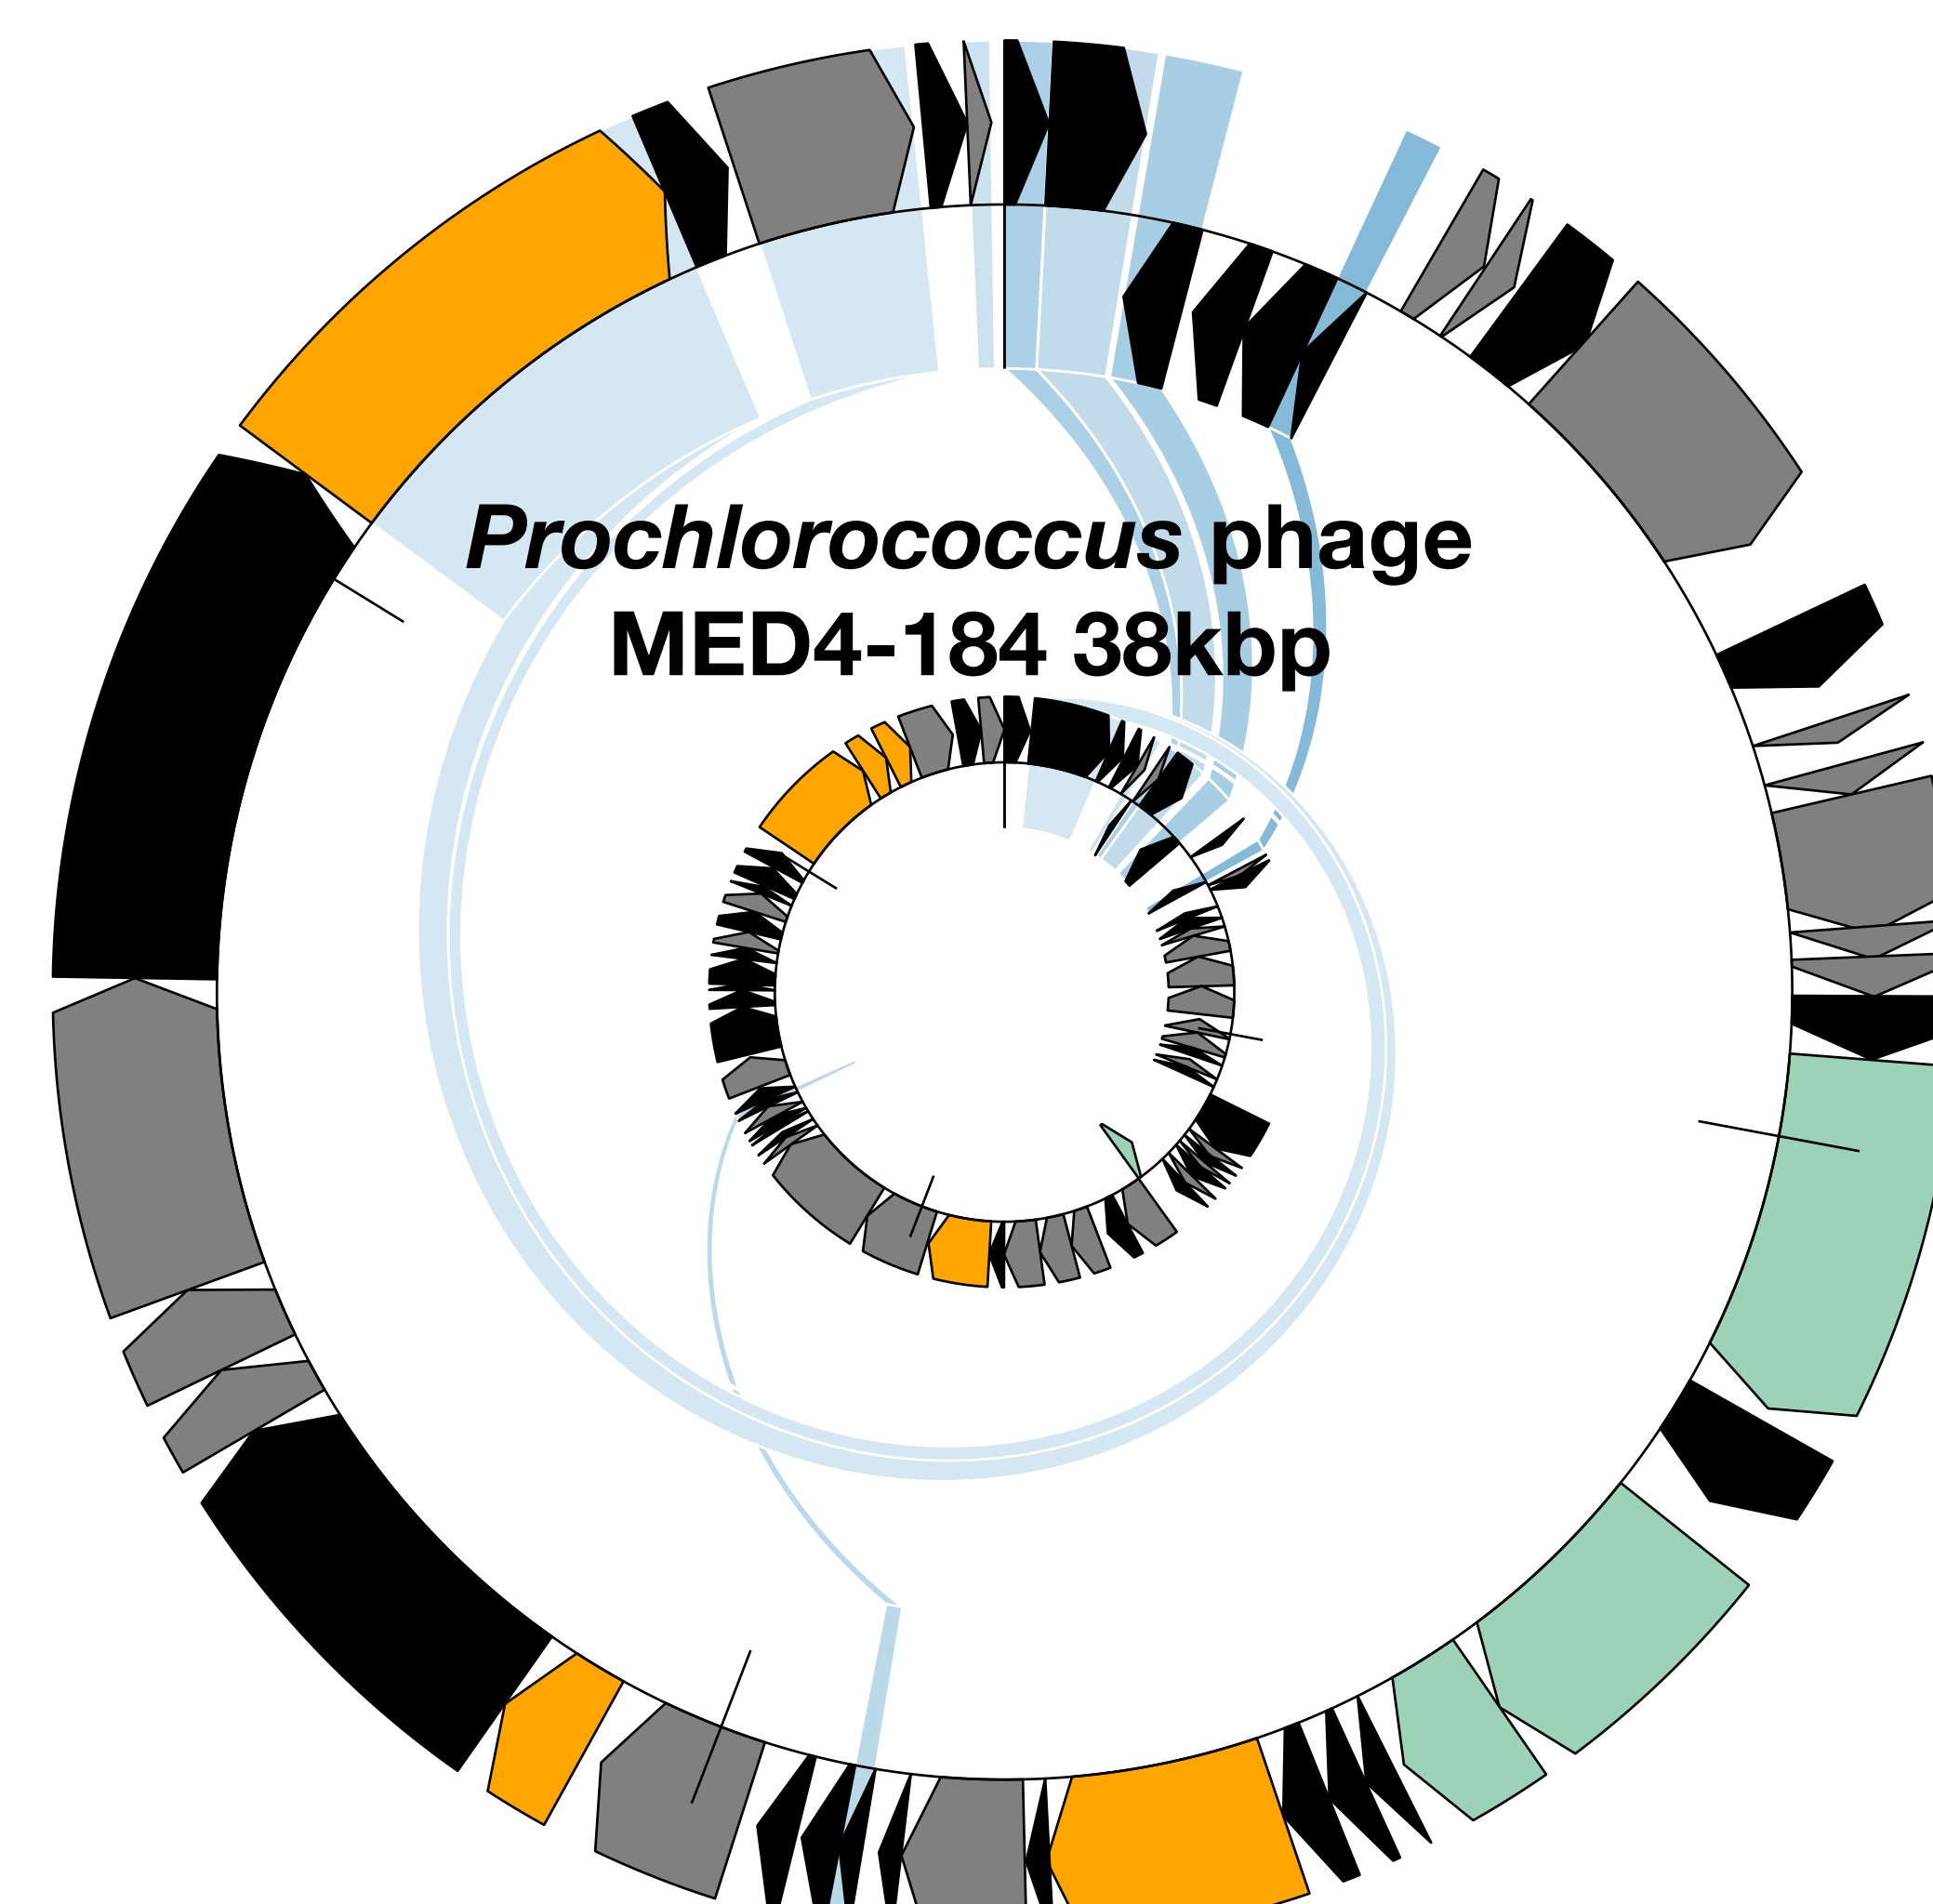

41447. putative *Prochlorococcus* phage  
complete genome 199kbp

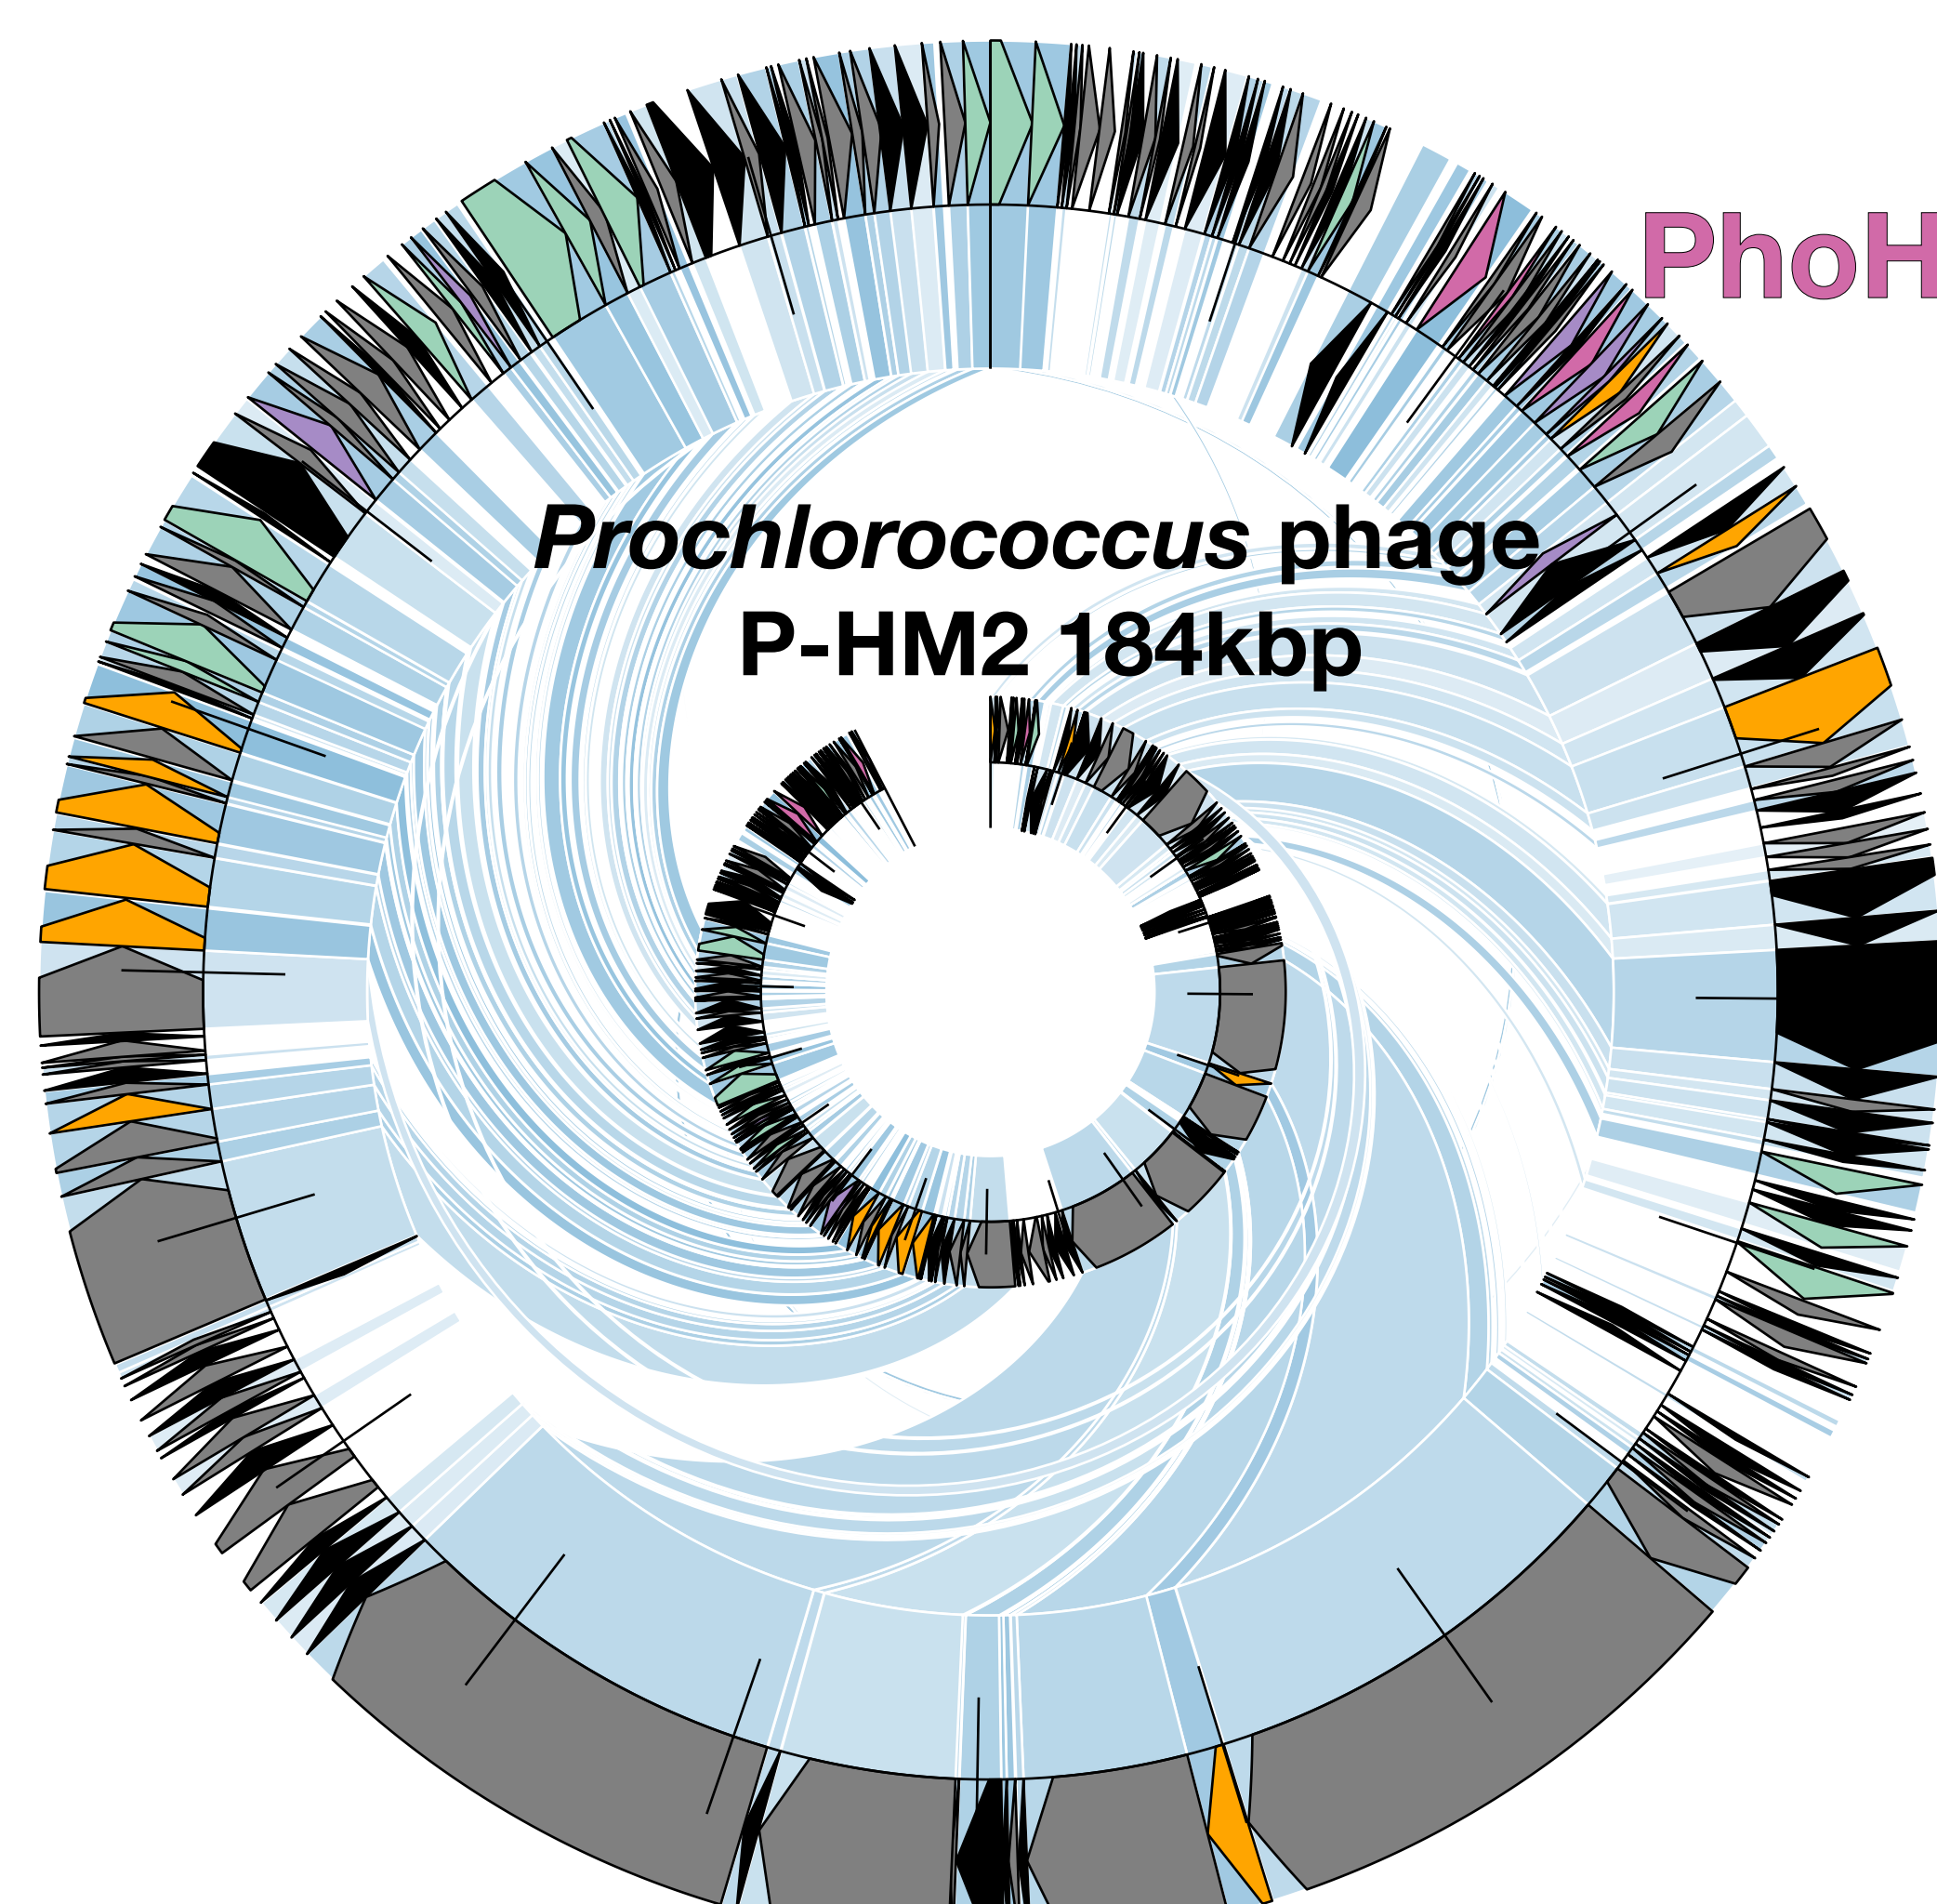

Supplement: 41396_2020_604_MOESM6_ESM.pdf [file 41396_2020_604_MOESM6_ESM.pdf]
