# Supplementary material for: Double-stranded DNA virioplankton dynamics and reproductive strategies in the oligotrophic open ocean water column
Source: PubMed Central journal article supplement (PMC7174320; doi:10.1038/s41396-020-0604-8), 2020-02-14
Supplement: 41396_2020_604_MOESM5_ESM.pdf [file 41396_2020_604_MOESM5_ESM.pdf]

### a. RefSeq hits to archaea/archaeal virus (632)

proportion of proteins without RefSeq hits

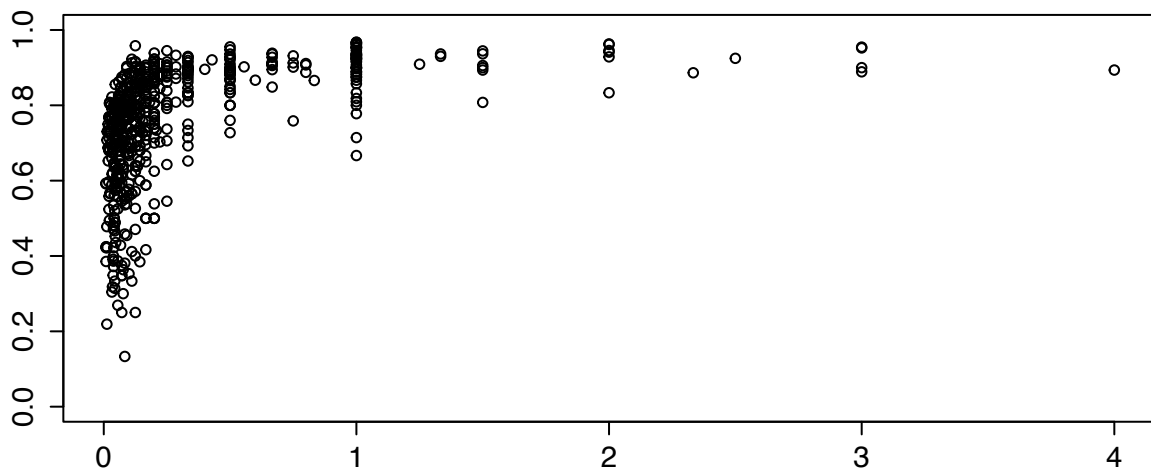

### b. archaeal protein marker (53)

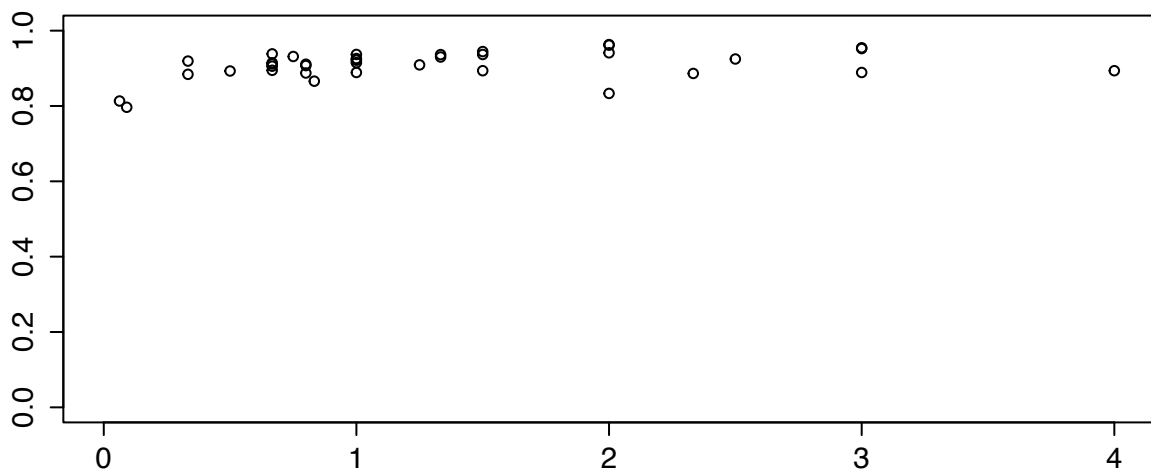

### c. RefSeq hits to archaea/archaeal virus, refined >0.5, >0.8 (147)

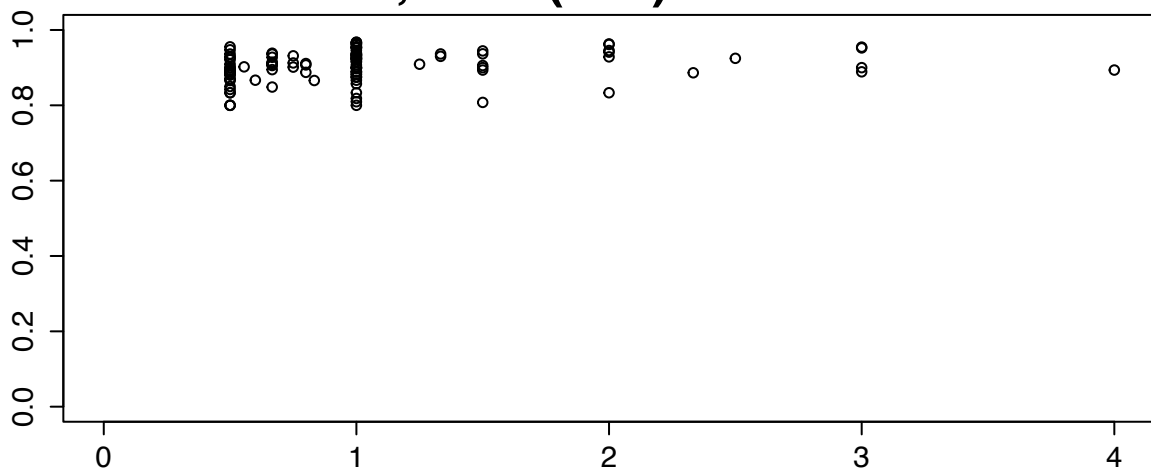

ratio of top protein hits to archaea/archaeal virus:Bacteria
