# Supplementary material for: Double-stranded DNA virioplankton dynamics and reproductive strategies in the oligotrophic open ocean water column
Source: PubMed Central journal article supplement (PMC7174320; doi:10.1038/s41396-020-0604-8), 2020-02-14

**a. cyanophage****b. thaumarchaeal virus**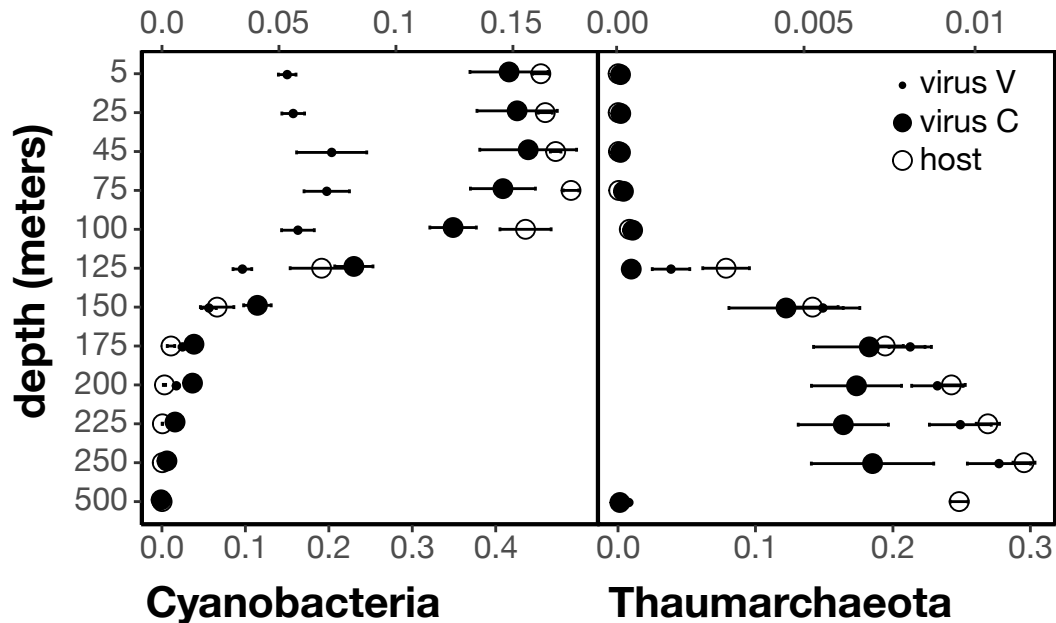

Supplement: 41396_2020_604_MOESM10_ESM.pdf [file 41396_2020_604_MOESM10_ESM.pdf]
