# Supplementary material for: Double-stranded DNA virioplankton dynamics and reproductive strategies in the oligotrophic open ocean water column
Source: PubMed Central journal article supplement (PMC7174320; doi:10.1038/s41396-020-0604-8), 2020-02-14

time

2014-11

2016-04

potential Crocosphaera phages (171)

5 depth (m)

25

45 coverage

sample max

0

75

100

125

150

175

200

225

250

500

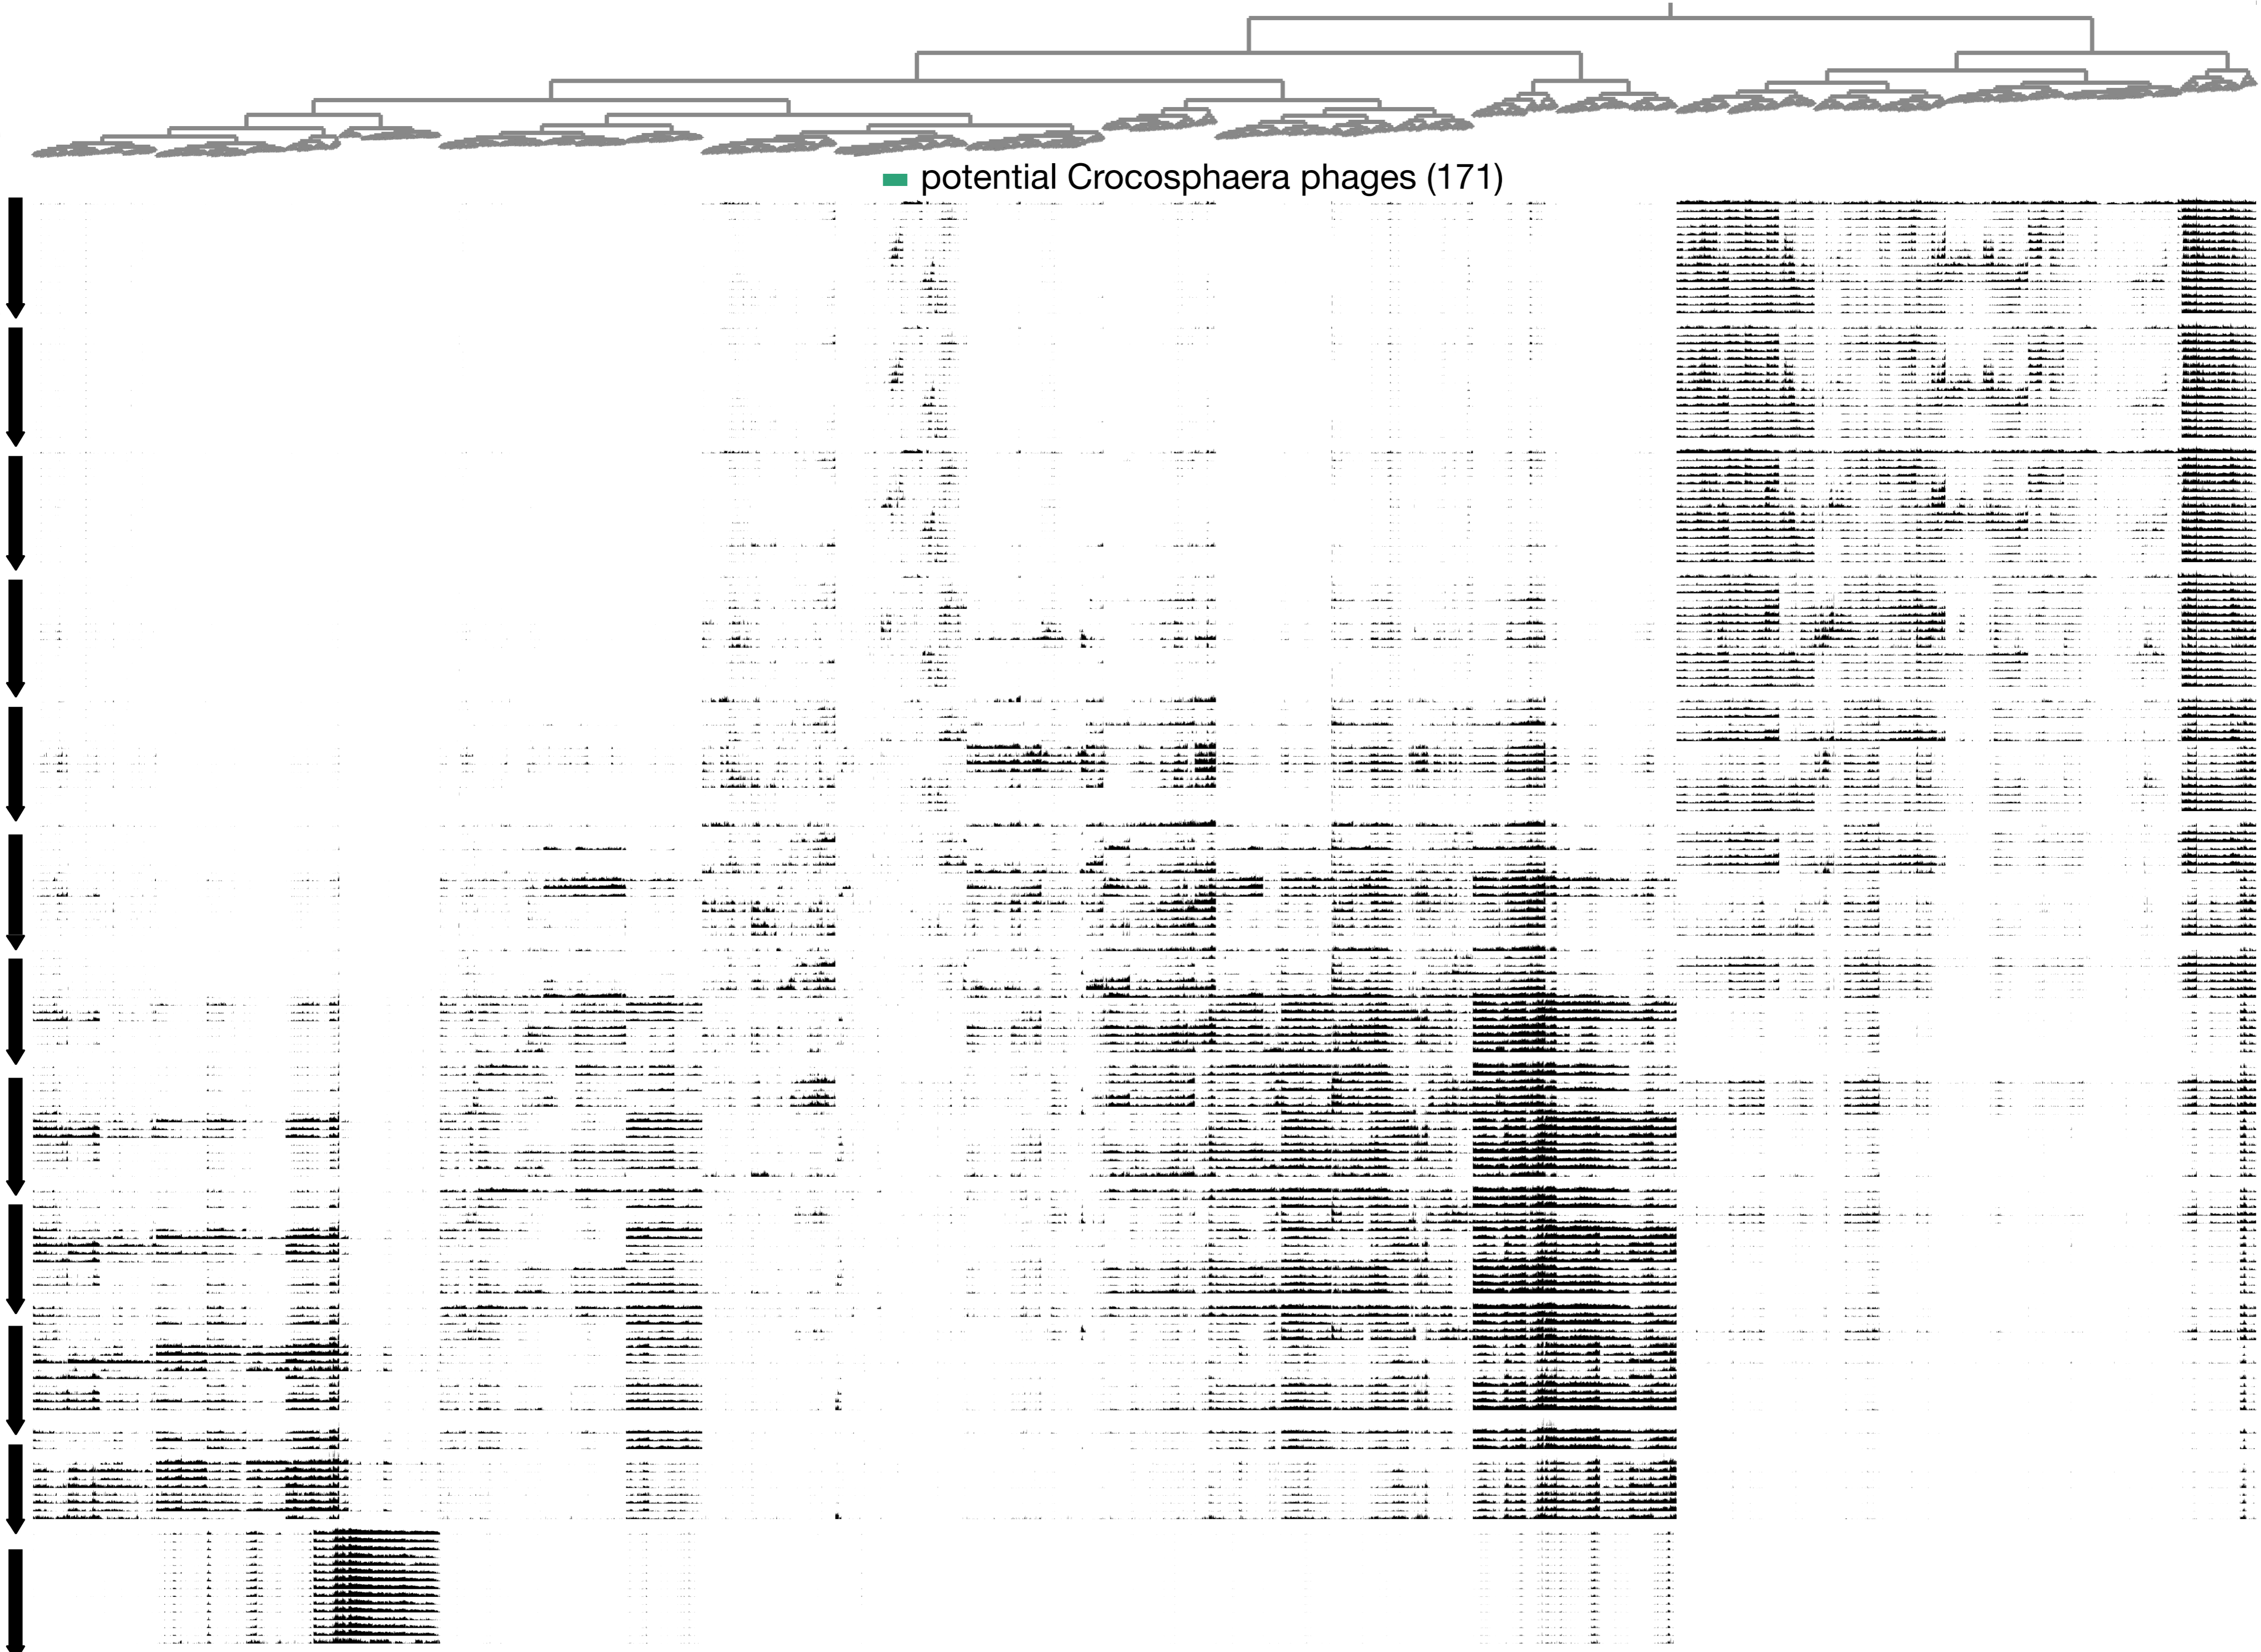

Supplement: 41396_2020_604_MOESM11_ESM.pdf [file 41396_2020_604_MOESM11_ESM.pdf]
